# Supplementary material for: Ketogenic diet-mediated steroid metabolism reprogramming improves the immune microenvironment and myelin growth in spinal cord injury rats according to gene and co-expression network analyses
Source: publisher site journal article supplement (doi:10.18632/aging.202969), 2021-05-06
Supplement: Supplementary file [file aging-v13i9-202969-supplementary-material-SD2.pdf]

## SUPPLEMENTARY TABLES

**Supplementary Table 1. Summary of Illumina post-sequencing sequence assembly.**

| Sample   | Clean reads | Clean bases | Error rate (%) | Q20 (%) | Q30 (%) | GC content (%) |
|----------|-------------|-------------|----------------|---------|---------|----------------|
| SCI_KD1  | 23065121    | 1.15E+09    | 0              | 100     | 100     | 48.6           |
| SCI_KD2  | 23109839    | 1.16E+09    | 0              | 100     | 100     | 48.9           |
| SCI_KD3  | 23240415    | 1.16E+09    | 0              | 100     | 100     | 48.55          |
| SCI_KD4  | 23094364    | 1.15E+09    | 0              | 100     | 100     | 49.56          |
| SCI_KD5  | 23093374    | 1.15E+09    | 0              | 100     | 100     | 49.74          |
| SCI_SD1  | 23705569    | 1.19E+09    | 0              | 100     | 100     | 48.98          |
| SCI_SD2  | 23294618    | 1.16E+09    | 0              | 100     | 100     | 48.71          |
| SCI_SD3  | 22920879    | 1.15E+09    | 0              | 100     | 100     | 48.48          |
| Sham_KD1 | 23720739    | 1.19E+09    | 0              | 100     | 100     | 49.27          |
| Sham_KD2 | 23702903    | 1.18E+09    | 0              | 100     | 100     | 49.77          |
| Sham_KD3 | 23382678    | 1.17E+09    | 0              | 100     | 100     | 49.86          |
| Sham_SD1 | 23486556    | 1.17E+09    | 0              | 100     | 100     | 49.97          |
| Sham_SD2 | 23150638    | 1.16E+09    | 0              | 100     | 100     | 48.86          |
| Sham_SD3 | 23165313    | 1.16E+09    | 0              | 100     | 100     | 48.62          |
| Sham_SD4 | 21452399    | 1.07E+09    | 0              | 100     | 100     | 48.96          |

**Supplementary Table 2. Mapping results between the transcriptome and reference genome.**

| Sample   | Total reads | Total mapped      | Multiple mapped  | Uniquely mapped   |
|----------|-------------|-------------------|------------------|-------------------|
| SCI_KD1  | 23065121    | 21443709 (92.97%) | 2274693 (9.86%)  | 19169016 (83.11%) |
| SCI_KD2  | 23109839    | 21515285 (93.1%)  | 2212778 (9.58%)  | 19302507 (83.53%) |
| SCI_KD3  | 23240415    | 21605446 (92.96%) | 2322963 (10.0%)  | 19282483 (82.97%) |
| SCI_KD4  | 23094364    | 21523546 (93.2%)  | 2150060 (9.31%)  | 19373486 (83.89%) |
| SCI_KD5  | 23093374    | 21509560 (93.14%) | 2239829 (9.7%)   | 19269731 (83.44%) |
| SCI_SD1  | 23705569    | 22083424 (93.16%) | 2566694 (10.83%) | 19516730 (82.33%) |
| SCI_SD2  | 23294618    | 21697617 (93.14%) | 2301896 (9.88%)  | 19395721 (83.26%) |
| SCI_SD3  | 22920879    | 21254877 (92.73%) | 2395814 (10.45%) | 18859063 (82.28%) |
| Sham_KD1 | 23720739    | 22140211 (93.34%) | 2187062 (9.22%)  | 19953149 (84.12%) |
| Sham_KD2 | 23702903    | 22091787 (93.2%)  | 2239448 (9.45%)  | 19852339 (83.75%) |
| Sham_KD3 | 23382678    | 21861517 (93.49%) | 2109646 (9.02%)  | 19751871 (84.47%) |
| Sham_SD1 | 23486556    | 21964601 (93.52%) | 2094514 (8.92%)  | 19870087 (84.6%)  |
| Sham_SD2 | 23150638    | 21578282 (93.21%) | 2172727 (9.39%)  | 19405555 (83.82%) |
| Sham_SD3 | 23165313    | 21556978 (93.06%) | 2303960 (9.95%)  | 19253018 (83.11%) |
| Sham_SD4 | 21452399    | 19967854 (93.08%) | 2080077 (9.7%)   | 17887777 (83.38%) |

Supplementary Table 5. A statistical table of the number of members (genes/transcripts) contained in each module. The first column is the module (indicated by the colour), and the second column is the number of members belonging to the module.

| <b>module</b> | <b>number</b> |
|---------------|---------------|
| blue          | 1221          |
| brown         | 873           |
| turquoise     | 1877          |
| grey          | 716           |
| yellow        | 263           |
| green         | 213           |
