# Supplementary material for: Ketogenic diet-mediated steroid metabolism reprogramming improves the immune microenvironment and myelin growth in spinal cord injury rats according to gene and co-expression network analyses
Source: Aging (Albany NY). 2021 May 6;13(9):12973–95. doi: 10.18632/aging.202969 (PMC8148504; doi:10.18632/aging.202969)
Supplement: Supplementary Table 3 [file aging-13-202969-s003.xls]

## Sheet: 表达差异详情表
Supplementary Table 3. List of 184 upregulated DEGs expressed between the SCI group and LV_SCI group.
Gene_id	Gene name	Gene description	FC(SCI_KD/SCI_SD)	Log2FC(SCI_KD/SCI_SD)	Pvalue	Padjust	Significant	Regulate	SCI_SD1	SCI_SD2	SCI_SD3	SCI_KD1	SCI_KD2	SCI_KD3	SCI_KD4	SCI_KD5	SCI_SD	SCI_KD
ENSRNOG00000002579	Parm1	prostate androgen-regulated mucin-like protein 1 [Source:RGD Symbol;Acc:708342]	1.55	0.632645	1.85763e-12	2.18764e-08	yes	up	8.89	12.03	11.23	18.28	19.31	16.97	18.85	18.35	10.7167	18.352
ENSRNOG00000050374	Pigg	phosphatidylinositol glycan anchor biosynthesis, class G [Source:RGD Symbol;Acc:1560335]	7.68372e+06	22.8734	9.70823e-11	4.5483e-07	yes	up	0	0	0	3.16	0	0	2.91	0	0	1.214
ENSRNOG00000016122	Hmgcr	3-hydroxy-3-methylglutaryl-CoA reductase [Source:RGD Symbol;Acc:2803]	1.699	0.764939	7.20815e-09	1.44729e-05	yes	up	14.15	16.19	14.02	28.92	34.33	22.53	27.32	26.41	14.7867	27.902
ENSRNOG00000012826	Creb3l2	cAMP responsive element binding protein 3-like 2 [Source:RGD Symbol;Acc:1306040]	1.593	0.671963	5.42378e-09	1.44729e-05	yes	up	11.43	18.25	15.24	26.14	25.75	24.26	30.74	24.41	14.9733	26.26
ENSRNOG00000013658	Nefl	neurofilament light [Source:RGD Symbol;Acc:621458]	1.258	0.331422	1.50814e-07	0.000181956	yes	up	578.89	654.09	625.86	849.07	900.37	807.14	915.85	859.78	619.613	866.442
ENSRNOG00000025012	Chat	choline O-acetyltransferase [Source:RGD Symbol;Acc:1304627]	1.491	0.576541	1.68298e-07	0.000181956	yes	up	8.53	9.53	7.37	14.28	14.08	12.77	15.68	13.39	8.47667	14.04
ENSRNOG00000017879	Gab1	GRB2-associated binding protein 1 [Source:RGD Symbol;Acc:1311085]	1.334	0.415809	1.59094e-07	0.000181956	yes	up	32.39	44.65	40.97	57.87	58.02	55.26	61.53	57.85	39.3367	58.106
ENSRNOG00000009550	Sqle	squalene epoxidase [Source:RGD Symbol;Acc:3755]	1.624	0.699884	3.64331e-07	0.000320042	yes	up	43.02	50.25	50.22	92.22	99.95	70.27	77.37	91.03	47.83	86.168
ENSRNOG00000016924	Acly	ATP citrate lyase [Source:RGD Symbol;Acc:2018]	1.422	0.507475	4.13866e-07	0.000323161	yes	up	74.33	88.67	82.78	128.14	145.32	107.28	133.19	131.78	81.9267	129.142
ENSRNOG00000033389	Susd2	sushi domain containing 2 [Source:RGD Symbol;Acc:1308595]	1.385	0.470016	5.80453e-07	0.000390105	yes	up	32.25	33.52	33.4	50.64	51.98	44.92	58.02	46.92	33.0567	50.496
ENSRNOG00000007705	Kcnj10	potassium voltage-gated channel subfamily J member 10 [Source:NCBI gene;Acc:29718]	1.527	0.610914	5.82867e-07	0.000390105	yes	up	71.51	104.39	66.18	135.2	154.02	126.86	143.21	117.94	80.6933	135.446
ENSRNOG00000009946	Ldlr	low density lipoprotein receptor [Source:RGD Symbol;Acc:2998]	1.685	0.752628	7.51638e-07	0.000442091	yes	up	19.38	21.05	20.76	38.01	43.28	27.72	38.76	43.44	20.3967	38.242
ENSRNOG00000008305	Sc5d	sterol-C5-desaturase [Source:RGD Symbol;Acc:620775]	1.546	0.628278	9.08294e-07	0.000510643	yes	up	59.46	75.57	68.35	127.79	136.13	92.31	111.28	112.36	67.7933	115.974
ENSRNOG00000007552	Arhgap36	Rho GTPase activating protein 36 [Source:RGD Symbol;Acc:1565967]	1.325	0.405547	1.02508e-06	0.000534465	yes	up	11.16	13.84	12.26	18.85	23.29	20	22.11	19.14	12.42	20.678
ENSRNOG00000016552	Hmgcs1	3-hydroxy-3-methylglutaryl-CoA synthase 1 [Source:RGD Symbol;Acc:70970]	1.811	0.856577	2.87755e-06	0.00112344	yes	up	101.61	121.97	117.74	231.92	287.5	178.74	177.49	264.75	113.773	228.08
ENSRNOG00000009033	Cntn2	contactin 2 [Source:RGD Symbol;Acc:3821]	1.309	0.388323	4.45479e-06	0.00145609	yes	up	43.14	59.66	53.04	73.32	84.25	68.61	81.71	78.78	51.9467	77.334
ENSRNOG00000012106	Dnaja4	DnaJ heat shock protein family (Hsp40) member A4 [Source:RGD Symbol;Acc:1310035]	1.449	0.53487	6.0995e-06	0.00190508	yes	up	22.01	30.92	32.51	44.11	47.08	42.87	49.89	44.43	28.48	45.676
ENSRNOG00000013326	Hmbox1	homeobox containing 1 [Source:RGD Symbol;Acc:1306787]	1.363	0.446542	6.46376e-06	0.00197496	yes	up	18.63	23.89	21.8	29.98	31.36	27.56	32.9	28.96	21.44	30.152
ENSRNOG00000013552	Scd	stearoyl-CoA desaturase [Source:RGD Symbol;Acc:621176]	1.915	0.93711	6.93288e-06	0.00207323	yes	up	27.69	23.85	27.92	68.61	69.97	41.16	45.44	58.69	26.4867	56.774
ENSRNOG00000025793	Usp31	ubiquitin specific peptidase 31 [Source:RGD Symbol;Acc:1308183]	1.71	0.774183	7.76082e-06	0.00223411	yes	up	9.91	13.18	10.4	22.64	26.56	21.41	17.41	16.01	11.1633	20.806
ENSRNOG00000007583	Pygb	glycogen phosphorylase B [Source:RGD Symbol;Acc:3460]	1.424	0.509567	7.99621e-06	0.00224773	yes	up	44.86	70.56	55.08	91.08	95.36	78.47	102.8	77.6	56.8333	89.062
ENSRNOG00000024039	Serinc5	serine incorporator 5 [Source:RGD Symbol;Acc:621571]	1.297	0.375248	9.61117e-06	0.00245609	yes	up	39.44	53.82	42.36	61.31	69.32	57.62	67.86	67.23	45.2067	64.668
ENSRNOG00000032788	Dysf	dysferlin [Source:RGD Symbol;Acc:1311023]	1.52	0.604241	1.6985e-05	0.00373006	yes	up	1.93	2.28	2.41	3.92	3.74	3.16	4.41	3.42	2.20667	3.73
ENSRNOG00000026212	Micall1	MICAL-like 1 [Source:RGD Symbol;Acc:1305415]	1.252	0.324121	1.66355e-05	0.00373006	yes	up	25.12	32.09	26.38	38.41	39.43	33.79	42.56	38.79	27.8633	38.596
ENSRNOG00000007837	Acot11	acyl-CoA thioesterase 11 [Source:RGD Symbol;Acc:2324815]	2.149	1.10355	1.68842e-05	0.00373006	yes	up	2.37	5.02	3.63	9.38	8.51	7.52	12.12	5.7	3.67333	8.646
ENSRNOG00000005577	Desi1	desumoylating isopeptidase 1 [Source:RGD Symbol;Acc:1305776]	1.216	0.282687	2.11371e-05	0.00424402	yes	up	66.27	77.9	69.29	92.61	101.17	94.57	103.24	88.59	71.1533	96.036
ENSRNOG00000007234	Cyp51	cytochrome P450, family 51 [Source:RGD Symbol;Acc:2481]	1.579	0.659195	2.17689e-05	0.00430931	yes	up	109.3	111.21	119.13	216	237.58	156.51	175.85	210.12	113.213	199.212
ENSRNOG00000011882	Gab2	GRB2-associated binding protein 2 [Source:RGD Symbol;Acc:621367]	1.427	0.512765	2.31521e-05	0.00445758	yes	up	16.85	24.46	22.79	35.78	34.83	29.69	38.62	29.55	21.3667	33.694
ENSRNOG00000023993	Kif1a	kinesin family member 1A [Source:RGD Symbol;Acc:1304996]	1.631	0.705334	2.4367e-05	0.00456654	yes	up	72.72	144.99	117.04	199.34	216.69	168.08	242.26	170.76	111.583	199.426
ENSRNOG00000016847	Bace1	beta-secretase 1 [Source:RGD Symbol;Acc:2191]	1.372	0.45592	2.43679e-05	0.00456654	yes	up	33.5	49.13	34.41	55.85	65.89	53.75	58.57	59.86	39.0133	58.784
ENSRNOG00000008901	Coro2a	coronin 2A [Source:RGD Symbol;Acc:1309719]	1.829	0.871157	2.47749e-05	0.00458173	yes	up	1.33	2.16	2.09	3.79	3.68	3.57	4.42	3.26	1.86	3.744
ENSRNOG00000029510	Plxnb1	plexin B1 [Source:RGD Symbol;Acc:1310564]	1.611	0.688022	3.16351e-05	0.00567879	yes	up	7.96	15.95	10.63	21.63	20.29	17.6	24.25	17.44	11.5133	20.242
ENSRNOG00000024757	AABR07069219.1	-	1.21	0.274715	3.82372e-05	0.00626216	yes	up	126.99	152.96	147.14	189.61	192.98	176.98	203.94	191.85	142.363	191.072
ENSRNOG00000054820	RF00007	-	1.498	0.582649	3.81817e-05	0.00626216	yes	up	16.18	26.34	23.27	38.26	36.21	30.59	40.8	34.62	21.93	36.096
ENSRNOG00000004756	Syt2	synaptotagmin 2 [Source:RGD Symbol;Acc:3804]	1.558	0.63982	4.45073e-05	0.00702865	yes	up	61.49	90.26	107.6	147.08	156.24	137.62	175.88	132.35	86.45	149.834
ENSRNOG00000006787	Dhcr24	24-dehydrocholesterol reductase [Source:RGD Symbol;Acc:1306529]	1.576	0.656273	4.71406e-05	0.00736179	yes	up	99.92	104.42	115.43	184.35	218.45	135.73	185.5	212.66	106.59	187.338
ENSRNOG00000005076	Bcorl1	BCL6 co-repressor-like 1 [Source:RGD Symbol;Acc:1566108]	1.473	0.558918	4.91079e-05	0.00758474	yes	up	3.35	4.91	5.06	6.53	7.32	6.58	8.09	7.62	4.44	7.228
ENSRNOG00000017210	Slc22a23	solute carrier family 22, member 23 [Source:RGD Symbol;Acc:620302]	1.24	0.310703	5.3981e-05	0.00798635	yes	up	26.56	32.97	30.42	40.15	45.51	37.85	42.21	40.52	29.9833	41.248
ENSRNOG00000018755	Acss2	acyl-CoA synthetase short-chain family member 2 [Source:RGD Symbol;Acc:1305489]	1.545	0.627153	5.89968e-05	0.0086375	yes	up	41.05	41.45	40.99	69.79	87.48	58.44	60.97	77.25	41.1633	70.786
ENSRNOG00000011007	Ube2o	ubiquitin-conjugating enzyme E2O [Source:RGD Symbol;Acc:1310297]	1.419	0.505094	6.0123e-05	0.00869189	yes	up	22.8	31.49	32.41	44.69	48.33	37.48	51.86	44.88	28.9	45.448
ENSRNOG00000020058	Celsr2	cadherin, EGF LAG seven-pass G-type receptor 2 [Source:RGD Symbol;Acc:69237]	1.29	0.367385	6.67693e-05	0.00902349	yes	up	52.55	66.58	63.98	73.91	86.35	80.95	89.99	85.18	61.0367	83.276
ENSRNOG00000002983	Nf1x	nuclear factor 1 X [Source:RGD Symbol;Acc:69080]	1.493	0.577772	7.04663e-05	0.00934343	yes	up	20.48	34.04	26.14	47.68	41.01	35.56	49.7	46.14	26.8867	44.018
ENSRNOG00000012151	Itpripl1	ITPRIP like 1 [Source:RGD Symbol;Acc:1564158]	2.244	1.16638	7.79595e-05	0.00986016	yes	up	0.89	1.44	1.14	2.25	2.71	2.77	2.58	3.9	1.15667	2.842
ENSRNOG00000010392	Nrg1	neuregulin 1 [Source:RGD Symbol;Acc:621341]	1.521	0.605389	8.05444e-05	0.00993028	yes	up	3.74	6.16	5.66	9.37	8.13	8.33	9.81	7.76	5.18667	8.68
ENSRNOG00000028580	Pcnx2	pecanex 2 [Source:RGD Symbol;Acc:1305883]	1.39	0.475294	8.80121e-05	0.010057	yes	up	10.9	12.22	12.74	15.12	18.51	15.2	18.64	17.01	11.9533	16.896
ENSRNOG00000013867	Fgf1	fibroblast growth factor 1 [Source:RGD Symbol;Acc:2605]	1.358	0.441079	8.60218e-05	0.010057	yes	up	25.33	34	32.35	42.71	45.95	44.36	58.07	40.12	30.56	46.242
ENSRNOG00000009726	Grip2	glutamate receptor interacting protein 2 [Source:RGD Symbol;Acc:621668]	1.371	0.455128	9.51756e-05	0.0107015	yes	up	8.56	11.32	13.13	16.55	19.46	20.68	21.43	17.94	11.0033	19.212
ENSRNOG00000013089	Kif13b	kinesin family member 13B [Source:RGD Symbol;Acc:1303307]	1.484	0.569968	0.000105084	0.0114493	yes	up	7.43	9.83	10.01	15.19	16.72	13.93	17.85	11.29	9.09	14.996
ENSRNOG00000060410	Pcdh1	protocadherin 1 [Source:NCBI gene;Acc:307481]	1.562	0.643742	0.000108354	0.0116253	yes	up	4.65	8.85	7.96	12.85	12.61	10.89	14	10.95	7.15333	12.26
ENSRNOG00000053945	Daam2	dishevelled associated activator of morphogenesis 2 [Source:RGD Symbol;Acc:1306128]	1.264	0.33851	0.000107637	0.0116253	yes	up	15.61	18.86	16.06	24.33	25.33	22.27	22.58	23.33	16.8433	23.568
ENSRNOG00000014689	Zbtb4	zinc finger and BTB domain containing 4 [Source:RGD Symbol;Acc:1307184]	1.503	0.587715	0.000113682	0.0118356	yes	up	18.28	31.02	29.98	42.68	40.8	38.62	52.43	44.14	26.4267	43.734
ENSRNOG00000003442	Adora1	adenosine A1 receptor [Source:RGD Symbol;Acc:2048]	1.228	0.296724	0.000117287	0.0121211	yes	up	53.84	68.93	63.52	81.4	85.26	78.79	87.97	89.33	62.0967	84.55
ENSRNOG00000010597	Slc5a7	solute carrier family 5 member 7 [Source:RGD Symbol;Acc:69270]	1.902	0.927536	0.000121257	0.0123498	yes	up	6.4	17.4	8.98	23.38	22.73	26.31	18.02	20.82	10.9267	22.252
ENSRNOG00000042929	LOC100361087	hypothetical LOC100361087 [Source:RGD Symbol;Acc:2320873]	1.354	0.436895	0.000134913	0.0130784	yes	up	13.69	17.73	18.93	26	27.21	23.19	27.43	22.91	16.7833	25.348
ENSRNOG00000014254	Cpt1a	carnitine palmitoyltransferase 1A [Source:RGD Symbol;Acc:2396]	1.367	0.450638	0.000136224	0.0130784	yes	up	11.3	16.09	13.16	19.96	20.63	20.24	24.71	16.54	13.5167	20.416
ENSRNOG00000042971	LOC363337	similar to RIKEN cDNA 1700081O22 [Source:RGD Symbol;Acc:1359598]	1.471	0.556622	0.000137186	0.0130784	yes	up	6.97	8.74	6.43	13.5	12.74	11.81	11.77	10.25	7.38	12.014
ENSRNOG00000001329	Gjc3	gap junction protein, gamma 3 [Source:RGD Symbol;Acc:727930]	1.594	0.672585	0.000138798	0.0130926	yes	up	12.12	15.06	17.38	30.34	29.62	24.07	24.17	26.99	14.8533	27.038
ENSRNOG00000021237	RGD1565616	RGD1565616 [Source:RGD Symbol;Acc:1565616]	1.353	0.435746	0.000161501	0.0146445	yes	up	29.52	42.68	31.23	54.1	58.06	51.15	50.61	42.58	34.4767	51.3
ENSRNOG00000026679	Scn4b	sodium voltage-gated channel beta subunit 4 [Source:RGD Symbol;Acc:631404]	1.396	0.481812	0.000160344	0.0146445	yes	up	58.16	79.8	85.98	112.07	121.79	103.64	137.36	103.66	74.6467	115.704
ENSRNOG00000006859	Insig1	insulin induced gene 1 [Source:RGD Symbol;Acc:708457]	1.593	0.67201	0.000173371	0.0153254	yes	up	31.28	38.56	42.15	67.96	83.74	48.86	58.5	70.8	37.33	65.972
ENSRNOG00000009963	Ctps1	CTP synthase 1 [Source:RGD Symbol;Acc:1311060]	1.306	0.384928	0.000193558	0.0164877	yes	up	21.75	24.16	24.99	37.43	35.3	30.52	34.8	33.54	23.6333	34.318
ENSRNOG00000002142	Cds1	CDP-diacylglycerol synthase 1 [Source:RGD Symbol;Acc:621185]	1.372	0.45585	0.000198161	0.016778	yes	up	19.32	31.05	25.72	37.91	39.8	35.61	44.93	33.26	25.3633	38.302
ENSRNOG00000000967	Aacs	acetoacetyl-CoA synthetase [Source:RGD Symbol;Acc:708522]	1.649	0.721401	0.000206254	0.0172553	yes	up	11.54	11.9	11.55	21.33	24.53	15.45	18.4	27.17	11.6633	21.376
ENSRNOG00000008218	Atp6v0e2	ATPase, H+ transporting V0 subunit e2 [Source:RGD Symbol;Acc:1303238]	1.328	0.4089	0.000212295	0.0176556	yes	up	112.53	166.75	145.33	192.28	220.27	180.08	222.31	220.44	141.537	207.076
ENSRNOG00000012663	Mfsd6	major facilitator superfamily domain containing 6 [Source:RGD Symbol;Acc:1562317]	1.327	0.407698	0.000223397	0.0180967	yes	up	31.36	48.23	44.16	62.54	66.9	59.41	65.25	53.89	41.25	61.598
ENSRNOG00000026091	Slc10a4	solute carrier family 10, member 4 [Source:RGD Symbol;Acc:1309536]	1.439	0.524613	0.000222408	0.0180967	yes	up	18.02	18.1	20.63	29.99	30.13	25.47	32.38	33.84	18.9167	30.362
ENSRNOG00000019208	P2rx5	purinergic receptor P2X 5 [Source:RGD Symbol;Acc:620256]	1.44	0.526289	0.000229646	0.0184015	yes	up	3.07	4.03	3.56	5.62	6	4.91	6.33	5.46	3.55333	5.664
ENSRNOG00000003590	Tom1l2	target of myb1 like 2 membrane trafficking protein [Source:RGD Symbol;Acc:1306728]	1.187	0.247485	0.000233918	0.0184015	yes	up	65.19	83.62	73.73	96.17	104.34	91.63	111.71	92.27	74.18	99.224
ENSRNOG00000007727	Lhfpl4	LHFPL tetraspan subfamily member 4 [Source:RGD Symbol;Acc:727967]	1.628	0.703251	0.000231118	0.0184015	yes	up	5.15	8.81	7.76	15.2	12.43	11.8	13.7	11.65	7.24	12.956
ENSRNOG00000012358	Pcyt1b	phosphate cytidylyltransferase 1, choline, beta [Source:RGD Symbol;Acc:708434]	1.565	0.646502	0.000243846	0.0188311	yes	up	9.07	17.71	15.83	26.11	27.24	22.29	24.11	21.78	14.2033	24.306
ENSRNOG00000020468	Stard4	StAR-related lipid transfer domain containing 4 [Source:RGD Symbol;Acc:1309475]	1.808	0.85418	0.000250353	0.019228	yes	up	2.51	4.72	4.73	9.19	9.26	5.93	9.03	6.26	3.98667	7.934
ENSRNOG00000001368	Rph3a	rabphilin 3A [Source:RGD Symbol;Acc:620073]	1.564	0.645554	0.000257099	0.0194594	yes	up	63.37	105.3	120.68	150.88	170.57	143.96	205.37	165.64	96.45	167.284
ENSRNOG00000011053	Cyp2u1	cytochrome P450, family 2, subfamily u, polypeptide 1 [Source:RGD Symbol;Acc:1309433]	1.397	0.482759	0.000262053	0.0195913	yes	up	9.39	12.19	8.48	15.4	17.26	12.97	17.44	14.37	10.02	15.488
ENSRNOG00000004806	Strn	striatin [Source:RGD Symbol;Acc:3782]	1.54	0.622732	0.000271498	0.0199786	yes	up	11.84	19.4	14.59	28.8	32	24.97	23.02	20.13	15.2767	25.784
ENSRNOG00000014135	Rab11fip4	RAB11 family interacting protein 4 [Source:RGD Symbol;Acc:1305063]	1.311	0.390574	0.000280282	0.0205175	yes	up	23.52	32.66	32.72	43.14	47.54	39.44	46.14	39.54	29.6333	43.16
ENSRNOG00000033568	Mapk8ip3	mitogen-activated protein kinase 8 interacting protein 3 [Source:RGD Symbol;Acc:1563691]	1.402	0.487075	0.000296072	0.020911	yes	up	56.6	99.08	89.47	129.44	135.77	111.54	149.44	121.42	81.7167	129.522
ENSRNOG00000010646	Tmem229b	transmembrane protein 229B [Source:RGD Symbol;Acc:1562622]	1.42	0.505808	0.000291463	0.020911	yes	up	21.95	28.87	33.54	40.42	47.87	41.23	51.84	40.57	28.12	44.386
ENSRNOG00000000060	Cplx1	complexin 1 [Source:RGD Symbol;Acc:70944]	1.56	0.641188	0.000295444	0.020911	yes	up	298.15	398.15	546.27	675.99	761.15	613.1	824.72	721.17	414.19	719.226
ENSRNOG00000013729	RGD1306271	similar to KIAA1549 protein [Source:RGD Symbol;Acc:1306271]	1.705	0.770039	0.000294355	0.020911	yes	up	1.99	3.82	2.03	5.37	5.28	4.54	5.76	3.33	2.61333	4.856
ENSRNOG00000011142	Cyb5b	cytochrome b5 type B [Source:RGD Symbol;Acc:621551]	1.256	0.328673	0.000294549	0.020911	yes	up	31.42	41.91	32.98	46.33	46.8	41.61	46.41	50.29	35.4367	46.288
ENSRNOG00000004888	Spred2	sprouty-related, EVH1 domain containing 2 [Source:RGD Symbol;Acc:1309304]	1.463	0.548865	0.000304305	0.0212786	yes	up	7.28	11.09	10.02	14.09	16.08	13.66	16.21	14.62	9.46333	14.932
ENSRNOG00000014182	Tns1	tensin 1 [Source:RGD Symbol;Acc:68427]	1.842	0.881227	0.000311895	0.0214887	yes	up	4.08	8.44	6.93	14	11.42	10.27	20.17	9.81	6.48333	13.134
ENSRNOG00000014986	Ube4b	ubiquitination factor E4B [Source:RGD Symbol;Acc:1304738]	1.234	0.303843	0.000317278	0.0216473	yes	up	18.91	25.02	23.8	30.89	33.01	28.35	32.77	29.19	22.5767	30.842
ENSRNOG00000020279	Syt11	synaptotagmin 11 [Source:RGD Symbol;Acc:62042]	1.188	0.24864	0.000324341	0.0219164	yes	up	241.78	303.6	263.6	351.51	376.47	312.36	385.43	350.07	269.66	355.168
ENSRNOG00000027002	NEWGENE_1310139	microtubule associated serine/threonine kinase family member 4 [Source:RGD Symbol;Acc:9344213]	1.434	0.520192	0.000328358	0.0219765	yes	up	10.26	15.36	15.29	22.61	24.74	20.41	24.2	16.88	13.6367	21.768
ENSRNOG00000028992	Acan	aggrecan [Source:RGD Symbol;Acc:68358]	1.568	0.649138	0.000330762	0.0220034	yes	up	1.85	2.48	2.84	3.86	5.09	3.8	4.83	3.29	2.39	4.174
ENSRNOG00000002932	Wdr19	WD repeat domain 19 [Source:RGD Symbol;Acc:1306997]	1.46	0.546284	0.00033189	0.0220034	yes	up	2.51	4.45	3.78	6.1	6.04	5.37	5.78	5.36	3.58	5.73
ENSRNOG00000000924	Slc7a1	solute carrier family 7 member 1 [Source:RGD Symbol;Acc:3716]	1.497	0.58213	0.000339161	0.0222711	yes	up	9.69	11.69	13.81	18.36	21.15	15.82	25.52	17.3	11.73	19.63
ENSRNOG00000051838	AABR07057491.1	similar to similar to mKIAA0431 protein [Source:NCBI gene;Acc:680989]	2.019	1.01369	0.000344902	0.0222711	yes	up	0.76	2.14	1.21	3.03	2.55	2.74	3.69	2.84	1.37	2.97
ENSRNOG00000046005	Scd2	stearoyl-Coenzyme A desaturase 2 [Source:RGD Symbol;Acc:621177]	1.21	0.274914	0.000373958	0.0222711	yes	up	1742.42	1990.49	1665.5	2420.57	2622.54	2154.26	2638.56	2255.18	1799.47	2418.22
ENSRNOG00000048949	LOC102549542	elongation of very long chain fatty acids protein 6-like [Source:RGD Symbol;Acc:7527008]	1.618	0.6941	0.000358976	0.0222711	yes	up	4.35	8.65	6.49	12.65	13.7	10.86	9.76	10.28	6.49667	11.45
ENSRNOG00000046333	AABR07007032.1	-	1.238	0.308347	0.000373499	0.0222711	yes	up	41.99	60.71	43.53	69.33	76.23	67.78	84.44	58.69	48.7433	71.294
ENSRNOG00000000860	Vwa7	von Willebrand factor A domain containing 7 [Source:RGD Symbol;Acc:1303137]	1.557	0.638838	0.000349844	0.0222711	yes	up	3.34	5.66	4.81	6.92	8.2	6.32	8.79	9.11	4.60333	7.868
ENSRNOG00000014744	Pacs2	phosphofurin acidic cluster sorting protein 2 [Source:RGD Symbol;Acc:1597262]	1.322	0.402715	0.000349083	0.0222711	yes	up	136.7	181.81	128.43	216.21	248.65	181.78	219.68	219.29	148.98	217.122
ENSRNOG00000032297	Msmo1	methylsterol monooxygenase 1 [Source:RGD Symbol;Acc:620281]	1.447	0.532985	0.000367286	0.0222711	yes	up	113.65	104.95	102.92	178.05	204.23	147.91	150.48	184.65	107.173	173.064
ENSRNOG00000016690	Idi1	isopentenyl-diphosphate delta isomerase 1 [Source:RGD Symbol;Acc:621835]	1.891	0.91904	0.000383984	0.0226105	yes	up	11.7	17.35	14.63	32.88	40.56	27.64	16.2	33.39	14.56	30.134
ENSRNOG00000002917	Sec14l5	SEC14-like lipid binding 5 [Source:RGD Symbol;Acc:1564638]	1.521	0.604764	0.000403604	0.0233443	yes	up	8	11.02	7.03	12.7	18.08	14.75	12.63	14.36	8.68333	14.504
ENSRNOG00000012595	AC124205.1	-	20.362	4.34782	0.000418349	0.0234536	yes	up	0	0.95	0	9.24	9.78	4.5	2.26	4.92	0.316667	6.14
ENSRNOG00000018268	Hhip	Hedgehog-interacting protein [Source:RGD Symbol;Acc:1564108]	1.767	0.821121	0.000419629	0.0234536	yes	up	2.74	4.38	2.41	7.32	6.43	6.89	4.48	5.45	3.17667	6.114
ENSRNOG00000000062	Pcgf3	polycomb group ring finger 3 [Source:RGD Symbol;Acc:1311479]	1.405	0.490355	0.000418166	0.0234536	yes	up	7.52	11.89	8.18	14.79	14.7	13.98	14.56	12.83	9.19667	14.172
ENSRNOG00000006509	Srgap3	SLIT-ROBO Rho GTPase activating protein 3 [Source:RGD Symbol;Acc:1563152]	1.519	0.603028	0.000417631	0.0234536	yes	up	9.74	19.75	15.62	25.6	26.26	23.05	29.73	20.32	15.0367	24.992
ENSRNOG00000030983	B3galt5	Beta-1,3-galactosyltransferase 5 [Source:RGD Symbol;Acc:1306727]	1.284	0.360783	0.000426508	0.0236122	yes	up	24.32	27.84	26.07	35.3	42.13	31.39	37.86	37.83	26.0767	36.902
ENSRNOG00000008659	Arhgap21	Rho GTPase activating protein 21 [Source:RGD Symbol;Acc:1311028]	1.296	0.374345	0.000456307	0.0250322	yes	up	38.6	51.33	47.93	61.37	65.16	60.27	56.62	73.4	45.9533	63.364
ENSRNOG00000008625	Rimkla	ribosomal modification protein rimK-like family member A [Source:NCBI gene;Acc:313553]	1.696	0.761959	0.000466687	0.0254236	yes	up	7.69	17.68	13.61	23.21	27.88	20.65	29	19.54	12.9933	24.056
ENSRNOG00000009783	Camk2g	calcium/calmodulin-dependent protein kinase II gamma [Source:RGD Symbol;Acc:621802]	1.399	0.484803	0.000483659	0.0258473	yes	up	65.38	93.9	100.1	127.22	152.34	114.33	157.81	131.19	86.46	136.578
ENSRNOG00000018342	Ctif	cap binding complex dependent translation initiation factor [Source:RGD Symbol;Acc:1311887]	1.35	0.432719	0.000493778	0.0261888	yes	up	19.12	28.45	24.21	34.64	35.23	28.86	40.91	35.36	23.9267	35
ENSRNOG00000045918	Jarid2	jumonji and AT-rich interaction domain containing 2 [Source:RGD Symbol;Acc:1591663]	1.413	0.49826	0.000520665	0.0272703	yes	up	3.04	4.73	4.56	6.62	7	5.64	6.66	6.09	4.11	6.402
ENSRNOG00000012424	Adam23	ADAM metallopeptidase domain 23 [Source:RGD Symbol;Acc:1305739]	1.386	0.470602	0.00052193	0.0272703	yes	up	44.79	70.38	70.46	94.27	106.43	85.67	103.04	83.86	61.8767	94.654
ENSRNOG00000022268	Pnpla3	patatin-like phospholipase domain containing 3 [Source:RGD Symbol;Acc:1595843]	1.451	0.537416	0.000535098	0.02765	yes	up	4.33	4.82	4.47	7.15	8.67	6.28	6.54	7.94	4.54	7.316
ENSRNOG00000038766	LOC103694328	alanine and glycine-rich protein-like [Source:RGD Symbol;Acc:9319286]	1.692	0.75875	0.0005527	0.0281414	yes	up	3.54	6.64	6.09	10.46	10.83	8.72	13.33	7.25	5.42333	10.118
ENSRNOG00000047261	AABR07031445.1	-	1.397	0.482541	0.000583952	0.028798	yes	up	77.42	110.27	102.95	164.58	188.73	117.33	172.39	158.59	96.88	160.324
ENSRNOG00000003834	Map2k4	mitogen activated protein kinase kinase 4 [Source:RGD Symbol;Acc:1307040]	1.548	0.630687	0.000600155	0.0293908	yes	up	16.55	34.28	26.48	47.87	50.05	37.73	44.29	37.75	25.77	43.538
ENSRNOG00000004978	Prkacb	protein kinase cAMP-activated catalytic subunit beta [Source:RGD Symbol;Acc:1310574]	1.903	0.928547	0.000617552	0.0298271	yes	up	13.15	41.43	28.05	63.56	72.42	46.9	55.67	45.29	27.5433	56.768
ENSRNOG00000042041	Gal3st1	galactose-3-O-sulfotransferase 1 [Source:RGD Symbol;Acc:1583379]	1.279	0.355358	0.000624173	0.0298649	yes	up	26.26	22.66	17.28	22.84	27.7	21.88	23.32	31.39	22.0667	25.426
ENSRNOG00000054603	Pacsin1	protein kinase C and casein kinase substrate in neurons 1 [Source:RGD Symbol;Acc:3247]	1.502	0.587322	0.000653952	0.0308376	yes	up	53.57	89.35	107.03	146.05	160.5	123.03	167.38	130.63	83.3167	145.518
ENSRNOG00000043167	Itga9	integrin subunit alpha 9 [Source:RGD Symbol;Acc:1311191]	1.569	0.650207	0.000657678	0.0308376	yes	up	1.48	1.72	1.49	2.96	2.99	2.66	2.88	2.13	1.56333	2.724
ENSRNOG00000018950	Fa2h	fatty acid 2-hydroxylase [Source:RGD Symbol;Acc:1310347]	1.455	0.540842	0.000684495	0.0316166	yes	up	142.85	140.77	151.42	223.77	254.76	192.88	212.51	291.14	145.013	235.012
ENSRNOG00000008481	Reep1	receptor accessory protein 1 [Source:RGD Symbol;Acc:1305230]	1.322	0.402886	0.000700963	0.0318358	yes	up	23.08	28.92	32.22	41.44	43.18	35.65	44.94	40.97	28.0733	41.236
ENSRNOG00000005447	Ypel2	yippee-like 2 [Source:RGD Symbol;Acc:1311564]	1.349	0.431998	0.000719036	0.0320827	yes	up	8.09	13.5	9.8	15.3	16.9	14.61	15.69	14.84	10.4633	15.468
ENSRNOG00000009577	Ndst4	N-deacetylase and N-sulfotransferase 4 [Source:RGD Symbol;Acc:1306531]	2.078	1.05539	0.000736131	0.0326382	yes	up	0.43	1.09	0.66	1.49	2.13	1.57	1.65	1.38	0.726667	1.644
ENSRNOG00000006235	Nell2	neural EGFL like 2 [Source:RGD Symbol;Acc:620999]	1.216	0.282185	0.000764851	0.033346	yes	up	25.19	31.88	26.69	37.06	40.27	32.52	39.8	38.09	27.92	37.548
ENSRNOG00000002826	Hsd17b7	hydroxysteroid (17-beta) dehydrogenase 7 [Source:RGD Symbol;Acc:2837]	1.583	0.662439	0.000768701	0.033346	yes	up	6.43	7.84	7.73	15.01	16.63	9.43	10.6	12.75	7.33333	12.884
ENSRNOG00000023841	Cd99l2	CD99 molecule-like 2 [Source:RGD Symbol;Acc:620896]	1.575	0.654954	0.000764175	0.033346	yes	up	17.51	29.65	31.19	39.29	52.11	42.15	44.36	36.97	26.1167	42.976
ENSRNOG00000009345	Ugt8	UDP glycosyltransferase 8 [Source:RGD Symbol;Acc:3938]	1.482	0.567262	0.000764199	0.033346	yes	up	184.67	226.8	169.35	324.15	380.67	278.74	238.93	357.31	193.607	315.96
ENSRNOG00000017431	RGD1304884	similar to RIKEN cDNA 6430548M08 [Source:RGD Symbol;Acc:1304884]	1.296	0.374194	0.000772821	0.0334215	yes	up	43.84	59.68	56.26	75.28	90.95	68.71	89.49	67	53.26	78.286
ENSRNOG00000031814	Sort1	sortilin 1 [Source:RGD Symbol;Acc:619999]	1.165	0.220917	0.000796612	0.0337445	yes	up	108.02	134.32	113.31	146.4	160.86	144.8	174.18	140.07	118.55	153.262
ENSRNOG00000001738	Eif4g1	eukaryotic translation initiation factor 4 gamma, 1 [Source:RGD Symbol;Acc:1306144]	1.328	0.40903	0.000797505	0.0337445	yes	up	47	80.39	57.4	84.02	95.14	80.85	106.68	84.87	61.5967	90.312
ENSRNOG00000009431	Tbc1d4	TBC1 domain family, member 4 [Source:RGD Symbol;Acc:1561609]	1.605	0.682939	0.000808824	0.034036	yes	up	1.62	3.37	3.04	4.38	5.25	4.39	5.56	4.15	2.67667	4.746
ENSRNOG00000002248	Fryl	FRY like transcription coactivator [Source:RGD Symbol;Acc:1311309]	1.196	0.258482	0.000851083	0.0351823	yes	up	24.23	28.61	26.51	31.73	37.19	30.42	37.92	30.83	26.45	33.618
ENSRNOG00000014675	Pi4k2a	phosphatidylinositol 4-kinase type 2 alpha [Source:RGD Symbol;Acc:620485]	1.154	0.206088	0.000856725	0.0353116	yes	up	46.61	58.73	52.15	65.3	70.29	64.14	72.66	64.94	52.4967	67.466
ENSRNOG00000021118	Nomo1	nodal modulator 1 [Source:RGD Symbol;Acc:1305240]	1.225	0.292366	0.000859385	0.0353177	yes	up	22.03	26.48	23.57	30.73	34.49	29.26	38.47	30.5	24.0267	32.69
ENSRNOG00000018867	Klhdc7a	kelch domain containing 7A [Source:RGD Symbol;Acc:1309439]	1.642	0.715191	0.000901517	0.0360595	yes	up	2.54	2.92	2.96	4.88	5.62	4.47	7.06	3.72	2.80667	5.15
ENSRNOG00000033508	Mink1	misshapen-like kinase 1 [Source:RGD Symbol;Acc:1359135]	1.277	0.352573	0.000899065	0.0360595	yes	up	49.8	70.47	67.63	82.2	83.49	86.24	103.73	86.33	62.6333	88.398
ENSRNOG00000015619	Agfg1	ArfGAP with FG repeats 1 [Source:RGD Symbol;Acc:1560041]	1.302	0.380556	0.000885958	0.0360595	yes	up	15.07	24.28	17.5	26.84	27.56	26.65	26.67	27.34	18.95	27.012
ENSRNOG00000030515	Nfasc	neurofascin [Source:RGD Symbol;Acc:620911]	1.289	0.36572	0.000893838	0.0360595	yes	up	64.03	90.76	87.72	112.57	110.67	101.4	133.74	114.39	80.8367	114.554
ENSRNOG00000025545	Tvp23a	trans-golgi network vesicle protein 23 homolog A [Source:RGD Symbol;Acc:1566405]	1.492	0.577333	0.000894436	0.0360595	yes	up	4.97	5.31	6.62	9.07	8.91	9.05	10.77	9.05	5.63333	9.37
ENSRNOG00000001854	Tmtc1	transmembrane and tetratricopeptide repeat containing 1 [Source:RGD Symbol;Acc:1564868]	2.018	1.01325	0.000910268	0.0362431	yes	up	1.52	3.66	3.8	7.28	7.76	6.54	7.89	3.66	2.99333	6.626
ENSRNOG00000009863	Prrt3	proline-rich transmembrane protein 3 [Source:RGD Symbol;Acc:1562419]	1.462	0.548178	0.000932738	0.0367217	yes	up	6.21	10.27	13.08	16.11	17.91	15.41	20.34	15.26	9.85333	17.006
ENSRNOG00000019189	Acat2	acetyl-CoA acetyltransferase 2 [Source:RGD Symbol;Acc:1359366]	1.48	0.565717	0.000930944	0.0367217	yes	up	16.99	17.36	14.93	29.97	35	21.78	26.96	32.3	16.4267	29.202
ENSRNOG00000049484	AABR07054639.1	ATPase phospholipid transporting 9A (putative) [Source:NCBI gene;Acc:84011]	1.281	0.357209	0.000937944	0.0368235	yes	up	62.44	84.31	64.42	93.64	112.41	84.51	101.03	105.54	70.39	99.426
ENSRNOG00000015614	Ppp1r16b	protein phosphatase 1, regulatory subunit 16B [Source:RGD Symbol;Acc:1589460]	1.326	0.406632	0.000942181	0.0368868	yes	up	28.69	42.61	29.68	52.29	56.53	45.3	49.09	41.99	33.66	49.04
ENSRNOG00000006331	Elovl5	ELOVL fatty acid elongase 5 [Source:RGD Symbol;Acc:620583]	1.255	0.327633	0.000951704	0.0371561	yes	up	122.97	170.06	128.55	184.64	215.73	169.61	200.79	200.18	140.527	194.19
ENSRNOG00000010720	Mast4	microtubule associated serine/threonine kinase family member 4 [Source:RGD Symbol;Acc:1310139]	1.269	0.343529	0.000959929	0.0373734	yes	up	8.33	11.39	11.45	14.71	15.62	13.4	15.5	13.71	10.39	14.588
ENSRNOG00000014613	Ddah1	dimethylarginine dimethylaminohydrolase 1 [Source:RGD Symbol;Acc:70968]	1.294	0.372156	0.000997792	0.0385274	yes	up	21.9	26.06	28.68	37.97	34.18	35.13	43.34	33.94	25.5467	36.912
ENSRNOG00000018123	Ccny	cyclin Y [Source:RGD Symbol;Acc:1565969]	1.223	0.290657	0.00101075	0.038843	yes	up	27.99	39.13	32.86	46.26	47.28	42.4	47.75	41.23	33.3267	44.984
ENSRNOG00000026048	Gbf1	golgi brefeldin A resistant guanine nucleotide exchange factor 1 [Source:RGD Symbol;Acc:1307160]	1.247	0.318563	0.00103426	0.0393179	yes	up	16.83	22.94	21.67	28.48	29.93	24.71	32.89	26.42	20.48	28.486
ENSRNOG00000002079	Mapk10	mitogen activated protein kinase 10 [Source:RGD Symbol;Acc:3663]	1.292	0.369992	0.00104547	0.0395	yes	up	30.73	45.53	45.72	60.41	61.17	54.77	71.32	49.29	40.66	59.392
ENSRNOG00000048750	AABR07047576.1	-	6.386	2.67481	0.00104998	0.0395642	yes	up	0.06	0.21	0	0.3	0.69	1.27	0.23	0.44	0.09	0.586
ENSRNOG00000016309	Rgp1	RGP1 homolog, RAB6A GEF complex partner 1 [Source:RGD Symbol;Acc:1311757]	1.498	0.583292	0.00107265	0.0402031	yes	up	7.5	11.94	8.05	17.99	15.73	12.25	16.02	13.39	9.16333	15.076
ENSRNOG00000052395	AABR07071395.1	-	1.628	0.702751	0.00109253	0.0408393	yes	up	3	4.76	3.76	6.44	6.32	7.37	6.72	7.5	3.84	6.87
ENSRNOG00000008088	Btbd3	BTB domain containing 3 [Source:RGD Symbol;Acc:1311623]	1.469	0.554844	0.00112336	0.0412241	yes	up	17.3	33.32	23.72	45.38	45.73	36.19	36.2	34.88	24.78	39.676
ENSRNOG00000024272	Ino80d	INO80 complex subunit D [Source:RGD Symbol;Acc:1304808]	2.475	1.30736	0.0011233	0.0412241	yes	up	0.32	0.97	0.41	2.2	1.71	1.52	1.11	0.98	0.566667	1.504
ENSRNOG00000018982	Entpd3	ectonucleoside triphosphate diphosphohydrolase 3 [Source:RGD Symbol;Acc:631326]	1.312	0.391433	0.00112967	0.0412402	yes	up	7.69	10.1	9.69	12.38	14.93	12.4	15.59	11.47	9.16	13.354
ENSRNOG00000021057	Osbp	oxysterol binding protein [Source:RGD Symbol;Acc:1308069]	1.219	0.285652	0.00113477	0.041319	yes	up	15.05	20.6	19.18	25.02	25.35	22.79	26.84	23.16	18.2767	24.632
ENSRNOG00000025269	Slc25a44	solute carrier family 25, member 44 [Source:RGD Symbol;Acc:1307244]	1.327	0.408026	0.00114113	0.0414432	yes	up	11.01	16.61	14.42	19.62	21.58	17.71	22.78	20.9	14.0133	20.518
ENSRNOG00000001793	Heg1	heart development protein with EGF-like domains 1 [Source:RGD Symbol;Acc:1564641]	1.558	0.639462	0.00117823	0.0418181	yes	up	5.94	10.13	8.59	14.7	14.31	14.33	18.15	9.05	8.22	14.108
ENSRNOG00000013030	Pip4k2b	phosphatidylinositol-5-phosphate 4-kinase type 2 beta [Source:RGD Symbol;Acc:621710]	1.52	0.603717	0.00118868	0.0420272	yes	up	12.22	23.49	23.56	34.51	34.02	29.8	38.56	28.19	19.7567	33.016
ENSRNOG00000013282	Mctp1	multiple C2 and transmembrane domain containing 1 [Source:RGD Symbol;Acc:1305199]	1.729	0.790089	0.00120049	0.0421821	yes	up	0.81	2.03	1.29	2.68	2.94	2.41	2.4	2.14	1.37667	2.514
ENSRNOG00000030927	Grid2ip	Grid2 interacting protein [Source:RGD Symbol;Acc:1310492]	1.634	0.708252	0.00120988	0.042406	yes	up	0.93	1.4	1.35	2.51	2.22	1.77	2.13	2.43	1.22667	2.212
ENSRNOG00000012337	Pde1c	phosphodiesterase 1C [Source:RGD Symbol;Acc:68332]	2.049	1.03479	0.00122322	0.0426611	yes	up	4.48	18.9	10.77	18.54	30.33	16.37	18.45	27.05	11.3833	22.148
ENSRNOG00000017075	Slc35e2b	solute carrier family 35, member E2B [Source:RGD Symbol;Acc:1309076]	1.658	0.729713	0.00125638	0.0432805	yes	up	2.42	4.16	3.35	7.15	6.72	6.28	6.09	3.91	3.31	6.03
ENSRNOG00000011323	Lgi3	leucine-rich repeat LGI family, member 3 [Source:RGD Symbol;Acc:1311079]	1.205	0.268809	0.00126043	0.0433137	yes	up	97.93	118.95	112.79	137.77	151.17	130.67	161.43	153.21	109.89	146.85
ENSRNOG00000007041	Abcg2	ATP binding cassette subfamily G member 2 [Source:RGD Symbol;Acc:631345]	2.046	1.03276	0.00126626	0.0434081	yes	up	2.78	10.32	4.96	14.31	15.01	12.89	9.79	15.72	6.02	13.544
ENSRNOG00000008354	Slc9a8	solute carrier family 9 member A8 [Source:RGD Symbol;Acc:1308193]	1.459	0.545363	0.00127459	0.0434815	yes	up	5.99	11.11	7	13.13	13.36	11.82	15.21	10.57	8.03333	12.818
ENSRNOG00000025745	Gpr17	G protein-coupled receptor 17 [Source:RGD Symbol;Acc:1589785]	1.782	0.833807	0.00129492	0.0439943	yes	up	10.82	27.77	25.17	50.5	40.28	29.86	47.55	38.33	21.2533	41.304
ENSRNOG00000016352	Cbfa2t2	CBFA2/RUNX1 translocation partner 2 [Source:RGD Symbol;Acc:1309088]	1.477	0.563063	0.00131605	0.0443574	yes	up	4.02	7.46	6.14	9.39	10.3	8.67	11.47	7.79	5.87333	9.524
ENSRNOG00000005519	Grm3	glutamate metabotropic receptor 3 [Source:RGD Symbol;Acc:2744]	1.332	0.414116	0.00133763	0.0446565	yes	up	12.01	15.56	11.67	19.61	21.07	19.8	16.16	19.85	13.08	19.298
ENSRNOG00000018220	Pde4dip	phosphodiesterase 4D interacting protein [Source:RGD Symbol;Acc:708410]	1.301	0.380127	0.00134835	0.0448506	yes	up	28.7	39.75	37.6	50.04	54.03	44.29	56.41	44.89	35.35	49.932
ENSRNOG00000000931	Sfswap	splicing factor SWAP [Source:RGD Symbol;Acc:1305004]	1.196	0.258634	0.00135716	0.0449881	yes	up	23.17	30.8	30.94	35.63	37.59	32.32	37.57	39.9	28.3033	36.602
ENSRNOG00000003310	Tmem63a	transmembrane protein 63a [Source:RGD Symbol;Acc:1306829]	1.253	0.324899	0.00137956	0.0455158	yes	up	34.79	43.12	36.2	51.71	59.32	45.33	53.02	56.64	38.0367	53.204
ENSRNOG00000007377	Slit3	slit guidance ligand 3 [Source:RGD Symbol;Acc:69311]	1.547	0.629371	0.00140769	0.0460118	yes	up	1.05	1.72	1.21	2.08	2.06	1.92	3.08	2.14	1.32667	2.256
ENSRNOG00000030910	Grik4	glutamate ionotropic receptor kainate type subunit 4 [Source:RGD Symbol;Acc:2734]	1.193	0.254747	0.00142396	0.0464356	yes	up	18.05	22.55	17.94	25.18	29.4	24.5	27.8	23.63	19.5133	26.102
ENSRNOG00000005048	Trhr	thyrotropin releasing hormone receptor [Source:RGD Symbol;Acc:3904]	1.548	0.630297	0.00142786	0.0464552	yes	up	1.62	2.48	2.26	3.59	3.9	4.26	3.01	3.26	2.12	3.604
ENSRNOG00000021265	Cds2	CDP-diacylglycerol synthase 2 [Source:RGD Symbol;Acc:621186]	1.825	0.867579	0.00143706	0.0465389	yes	up	10.42	22.08	19.27	34.5	43.85	33.39	42.92	18.29	17.2567	34.59
ENSRNOG00000045653	Fam131a	family with sequence similarity 131, member A [Source:RGD Symbol;Acc:2322069]	303.067	8.24349	0.00147814	0.047087	yes	up	0.04	0.01	0	0	11.58	9.78	0	9.21	0.0166667	6.114
ENSRNOG00000021314	Fdft1	farnesyl diphosphate farnesyl transferase 1 [Source:RGD Symbol;Acc:61834]	1.471	0.556418	0.001486	0.047087	yes	up	42.58	40.4	43.88	65.67	87.11	53.24	62.29	79	42.2867	69.462
ENSRNOG00000013581	Extl3	exostosin-like glycosyltransferase 3 [Source:RGD Symbol;Acc:62065]	1.52	0.604394	0.00148749	0.047087	yes	up	5.86	12.23	8.62	13.96	12.74	13.91	18.87	10.99	8.90333	14.094
ENSRNOG00000018373	Tln2	talin 2 [Source:RGD Symbol;Acc:1565416]	1.304	0.382877	0.00152835	0.0477711	yes	up	15.37	19.89	17.66	25.33	29.86	22.85	28.49	20.34	17.64	25.374
ENSRNOG00000060937	AABR07059258.1	-	2.061	1.0434	0.00153082	0.0477711	yes	up	1.31	2.28	3.31	5.32	5.06	4.98	5.83	4.91	2.3	5.22
ENSRNOG00000013916	Nefm	neurofilament medium [Source:RGD Symbol;Acc:3160]	1.291	0.36835	0.00155405	0.0482511	yes	up	513.54	640.57	659.11	809.86	809.72	802.48	905.69	993.36	604.407	864.222
ENSRNOG00000016218	Gtf3c1	general transcription factor IIIC subunit 1 [Source:RGD Symbol;Acc:621048]	1.219	0.285887	0.00159819	0.0491329	yes	up	15.88	21.05	20.5	24.87	27.78	23.94	28.35	24.32	19.1433	25.852
ENSRNOG00000001352	Hectd4	HECT domain E3 ubiquitin protein ligase 4 [Source:RGD Symbol;Acc:1309762]	1.363	0.447054	0.00160961	0.0492879	yes	up	9.03	19.12	14.94	26.8	23.31	21.35	25.25	19.75	14.3633	23.292
ENSRNOG00000001621	C2cd2	C2 calcium-dependent domain containing 2 [Source:RGD Symbol;Acc:735112]	1.609	0.686089	0.00162785	0.0496335	yes	up	2.37	3.79	3.81	6.45	5.97	4.61	8.06	4.46	3.32333	5.91
ENSRNOG00000009446	Rxra	retinoid X receptor alpha [Source:RGD Symbol;Acc:3610]	1.4	0.485423	0.00163649	0.049678	yes	up	11.14	20.28	14.88	23.38	22.31	23.02	29.23	20.44	15.4333	23.676
