# Supplementary material for: Ketogenic diet-mediated steroid metabolism reprogramming improves the immune microenvironment and myelin growth in spinal cord injury rats according to gene and co-expression network analyses
Source: Aging (Albany NY). 2021 May 6;13(9):12973–95. doi: 10.18632/aging.202969 (PMC8148504; doi:10.18632/aging.202969)
Supplement: Supplementary Table 4 [file aging-13-202969-s004.xls]

## Sheet: 表达差异详情表
Supplementary Table 4. List of 279 downregulated DEGs expressed between the SCI group and LV_SCI group.
Gene_id	Gene name	Gene description	FC(SCI_KD/SCI_SD)	Log2FC(SCI_KD/SCI_SD)	Pvalue	Padjust	Significant	Regulate	SCI_SD1	SCI_SD2	SCI_SD3	SCI_KD1	SCI_KD2	SCI_KD3	SCI_KD4	SCI_KD5	SCI_SD	SCI_KD
ENSRNOG00000031579	LOC100363469	ribosomal protein S24-like [Source:RGD Symbol;Acc:2322976]	0.325	-1.61938	3.11297e-12	2.18764e-08	yes	down	49.83	36.58	50.63	18.03	15.02	17.29	20.5	13.11	45.68	16.79
ENSRNOG00000019080	Hsd3b7	hydroxy-delta-5-steroid dehydrogenase, 3 beta- and steroid delta-isomerase 7 [Source:RGD Symbol;Acc:628727]	0.273	-1.87525	6.85979e-09	1.44729e-05	yes	down	103.63	60.9	32.63	23.11	19.33	15.33	18.96	24.42	65.72	20.23
ENSRNOG00000024338	LOC690276	hypothetical protein LOC690276 [Source:RGD Symbol;Acc:1582838]	0.353	-1.50071	4.79656e-09	1.44729e-05	yes	down	305.72	207.56	149.29	100.93	84.14	74	70.23	108.68	220.857	87.596
ENSRNOG00000000490	Rps10	ribosomal protein S10 [Source:RGD Symbol;Acc:621024]	0.66	-0.600179	1.27953e-08	2.24798e-05	yes	down	192.99	184.68	166.43	103.82	123.01	109.61	149.85	108.26	181.367	118.91
ENSRNOG00000017560	Mdk	midkine [Source:RGD Symbol;Acc:69073]	0.634	-0.656533	7.5582e-08	0.000118034	yes	down	69.21	68.9	68.56	50.98	48.01	50.33	53.93	42.62	68.89	49.174
ENSRNOG00000052838	AABR07063274.1	-	0.305	-1.71381	9.30674e-08	0.000130806	yes	down	304.46	238.73	145.71	118.45	76.22	48.19	53.89	93.44	229.633	78.038
ENSRNOG00000032401	H3f3c	H3 histone family member 3C [Source:RGD Symbol;Acc:2321290]	0.644	-0.634465	2.40091e-07	0.000241034	yes	down	176.7	153.54	163.02	116.84	113.25	124.41	125.66	113.01	164.42	118.634
ENSRNOG00000030363	Psma8	proteasome subunit alpha 8 [Source:RGD Symbol;Acc:1311659]	0.15	-2.74048	2.6798e-07	0.000251097	yes	down	18.3	6.1	3.74	2.43	1.23	0.9	1.09	2.38	9.38	1.606
ENSRNOG00000002194	Coq2	coenzyme Q2, polyprenyltransferase [Source:RGD Symbol;Acc:1306722]	0.438	-1.19123	3.9944e-07	0.000323161	yes	down	148.41	96.68	76.57	56.19	60.58	42.16	48.62	57.31	107.22	52.972
ENSRNOG00000024382	Fcgr3a	Fc fragment of IgG receptor IIIa [Source:RGD Symbol;Acc:1303067]	0.497	-1.00787	4.93933e-07	0.000365381	yes	down	15.81	24.64	19.21	11.14	7.96	11.22	14.6	9.1	19.8867	10.804
ENSRNOG00000057092	Slfn4	schlafen 4 [Source:RGD Symbol;Acc:620455]	0.346	-1.53058	6.25999e-07	0.000399928	yes	down	6.28	6.27	6.74	1.84	1.6	1.73	2.49	1.46	6.43	1.824
ENSRNOG00000034254	Actb	actin, beta [Source:RGD Symbol;Acc:628837]	0.668	-0.581602	7.54905e-07	0.000442091	yes	down	1521.33	1553.55	1291.23	1009	977.5	1086.94	1308.76	1143.5	1455.37	1105.14
ENSRNOG00000014297	Sdc4	syndecan 4 [Source:RGD Symbol;Acc:3650]	0.62	-0.690201	1.04187e-06	0.000534465	yes	down	52.51	58.9	47.04	35.9	28.08	39.4	43.15	35.1	52.8167	36.326
ENSRNOG00000000723	RT1-CE5	RT1 class I, locus CE5 [Source:RGD Symbol;Acc:1595868]	0.436	-1.19721	1.06475e-06	0.000534465	yes	down	20.34	32.38	23.94	8.65	10.06	15.41	16.42	11.69	25.5533	12.446
ENSRNOG00000025764	AC128848.1	-	0.37	-1.43609	1.28761e-06	0.000604521	yes	down	157.36	143.09	126.37	36.81	36.16	82.95	85.01	55.27	142.273	59.24
ENSRNOG00000058589	AABR07046778.1	-	0.219	-2.19326	1.29033e-06	0.000604521	yes	down	468.78	1223.35	624.12	131.74	129.08	221.6	127.23	292.8	772.083	180.49
ENSRNOG00000012779	Msr1	macrophage scavenger receptor 1 [Source:RGD Symbol;Acc:1564316]	0.408	-1.2919	1.67891e-06	0.000754223	yes	down	3.57	3.83	2.12	1.63	1.34	1.09	2.17	1.27	3.17333	1.5
ENSRNOG00000021157	Ctss	cathepsin S [Source:RGD Symbol;Acc:621513]	0.603	-0.730126	1.71719e-06	0.000754223	yes	down	612.85	732.86	570.26	419.49	325.45	503.63	502.35	379.85	638.657	426.154
ENSRNOG00000001049	Tpt1	tumor protein, translationally-controlled 1 [Source:RGD Symbol;Acc:621623]	0.679	-0.558119	1.94367e-06	0.000827828	yes	down	1358.86	1422.9	1299.31	1074.31	939.04	1109.13	1176.75	848.04	1360.36	1029.45
ENSRNOG00000007310	Klrb1a	killer cell lectin-like receptor subfamily B, member 1A [Source:RGD Symbol;Acc:1586149]	0.371	-1.42966	2.25158e-06	0.00092542	yes	down	5.96	4.14	2.89	1.92	2.55	1.66	1.12	2.92	4.33	2.034
ENSRNOG00000047657	C4a	complement C4A [Source:RGD Symbol;Acc:620005]	0.374	-1.41697	2.3045e-06	0.00092542	yes	down	92.46	72.77	71.16	31.58	16.38	40.48	51.58	24.34	78.7967	32.872
ENSRNOG00000006658	Tmem269	transmembrane protein 269 [Source:RGD Symbol;Acc:1563015]	0.142	-2.81775	3.10058e-06	0.0011778	yes	down	166.2	87.39	59.52	22.75	16.66	7.19	8.8	28.04	104.37	16.688
ENSRNOG00000000195	LOC108348048	von Willebrand factor A domain-containing protein 5A [Source:RGD Symbol;Acc:11476240]	0.488	-1.03594	3.33758e-06	0.00123447	yes	down	2.99	3.65	3.49	1.3	2.43	2.08	2	1.36	3.37667	1.834
ENSRNOG00000006992	Rpl7	ribosomal protein L7 [Source:RGD Symbol;Acc:735169]	0.688	-0.538747	3.46173e-06	0.00124755	yes	down	35.82	33.64	31.63	26.05	22.96	26.74	28.2	25.53	33.6967	25.896
ENSRNOG00000040273	RGD1562402	similar to 60S ribosomal protein L27a [Source:RGD Symbol;Acc:1562402]	0.504	-0.988391	3.77703e-06	0.00129478	yes	down	169.76	117.31	144.2	78.79	64.79	72.94	108.57	85.04	143.757	82.026
ENSRNOG00000033697	Casp4	caspase 4 [Source:RGD Symbol;Acc:621757]	0.5	-0.999279	3.7557e-06	0.00129478	yes	down	13.68	15.86	9.97	6.76	5.58	9.34	7.33	6.52	13.17	7.106
ENSRNOG00000039744	RT1-CE4	RT1 class I, locus CE4 [Source:RGD Symbol;Acc:1598234]	0.519	-0.947544	4.19674e-06	0.00140441	yes	down	208.9	81.26	135.24	41.79	58.66	53.62	168.27	44.05	141.8	73.278
ENSRNOG00000019675	Pycard	PYD and CARD domain containing [Source:RGD Symbol;Acc:628637]	0.421	-1.24738	4.78321e-06	0.00152791	yes	down	11.2	14.61	8.86	4.43	3.57	6.5	7.52	4.83	11.5567	5.37
ENSRNOG00000012410	S100a1	S100 calcium binding protein A1 [Source:RGD Symbol;Acc:3614]	0.721	-0.472492	7.78879e-06	0.00223411	yes	down	202.77	212.31	176.52	147.42	146.08	160.64	181.89	154.79	197.2	158.164
ENSRNOG00000010746	Rpl32	ribosomal protein L32 [Source:RGD Symbol;Acc:621203]	0.696	-0.523014	8.50229e-06	0.00225471	yes	down	535	491.97	447.46	385	364.24	394.32	425.06	343.51	491.477	382.426
ENSRNOG00000042592	Rgs10	regulator of G-protein signaling 10 [Source:RGD Symbol;Acc:3562]	0.631	-0.664926	8.39304e-06	0.00225471	yes	down	70.81	92.87	68.84	54.51	43.93	63.37	61.54	46.28	77.5067	53.926
ENSRNOG00000025094	Gpr183	G protein-coupled receptor 183 [Source:RGD Symbol;Acc:1598095]	0.492	-1.02188	8.18458e-06	0.00225471	yes	down	7.78	10.83	5.87	4.04	3.48	5.17	5.4	3.99	8.16	4.416
ENSRNOG00000000853	Aif1	allograft inflammatory factor 1 [Source:RGD Symbol;Acc:61924]	0.553	-0.853876	9.55902e-06	0.00245609	yes	down	86.84	125.18	97.02	62.6	41.96	80.52	68.11	58.09	103.013	62.256
ENSRNOG00000051002	RT1-DMb	RT1 class II, locus DMb [Source:RGD Symbol;Acc:735096]	0.536	-0.899829	1.06332e-05	0.00266873	yes	down	54.43	72.11	66.34	33.78	23.17	43.92	51.01	33.44	64.2933	37.064
ENSRNOG00000006532	H3f3a	H3 histone family member 3A [Source:RGD Symbol;Acc:2319910]	0.762	-0.392643	1.19118e-05	0.00288656	yes	down	204.26	250.05	208.76	193.78	175.1	187.11	215.58	161.46	221.023	186.606
ENSRNOG00000039249	AABR07035539.1	ribosomal protein L31-like 4 [Source:NCBI gene;Acc:100361974]	0.646	-0.631035	1.17946e-05	0.00288656	yes	down	421.95	351.87	363.21	276.75	245.26	296.42	273.76	278.01	379.01	274.04
ENSRNOG00000013874	Rplp1	ribosomal protein lateral stalk subunit P1 [Source:RGD Symbol;Acc:621774]	0.534	-0.905545	1.24046e-05	0.00295502	yes	down	1200.23	921.72	614.26	506.56	498.61	601.4	601.14	523.31	912.07	546.204
ENSRNOG00000010549	Tspo	translocator protein [Source:RGD Symbol;Acc:2228]	0.468	-1.09637	1.56497e-05	0.00360585	yes	down	21.81	25.65	17.4	9.16	7.31	12.93	16.32	10.37	21.62	11.218
ENSRNOG00000020843	LOC100360087	ferritin light chain 1-like [Source:RGD Symbol;Acc:2322860]	0.562	-0.831781	1.54751e-05	0.00360585	yes	down	757.23	652.03	456.71	315.26	269.17	427.61	515.74	310.75	621.99	367.706
ENSRNOG00000017328	Pter	phosphotriesterase related [Source:RGD Symbol;Acc:61313]	0.559	-0.83798	1.81155e-05	0.00384046	yes	down	3.93	4.39	4.29	2.76	2.05	2.59	3.19	2.5	4.20333	2.618
ENSRNOG00000013578	Trem2	triggering receptor expressed on myeloid cells 2 [Source:RGD Symbol;Acc:1309841]	0.41	-1.28681	1.88323e-05	0.00384046	yes	down	77.65	89.43	64.88	30.11	15.96	46.45	51.1	31.79	77.32	35.082
ENSRNOG00000016961	Rps27	ribosomal protein S27 [Source:RGD Symbol;Acc:621045]	0.685	-0.545753	1.88539e-05	0.00384046	yes	down	898.65	880.71	797.9	569.71	595.65	689.61	796.39	635.01	859.087	657.274
ENSRNOG00000011821	S100a4	S100 calcium-binding protein A4 [Source:RGD Symbol;Acc:3245]	0.447	-1.16253	1.84227e-05	0.00384046	yes	down	219.97	294.63	182.44	92.47	72.6	170.16	150.4	85.86	232.347	114.298
ENSRNOG00000019430	Coro1a	coronin 1A [Source:RGD Symbol;Acc:620009]	0.617	-0.697754	1.88157e-05	0.00384046	yes	down	41.75	58.9	42.75	32.48	24.11	38.27	37.16	30.03	47.8	32.41
ENSRNOG00000003657	Pkmyt1	protein kinase, membrane associated tyrosine/threonine 1 [Source:RGD Symbol;Acc:1305434]	0.424	-1.23912	2.26154e-05	0.00441472	yes	down	9.25	5.67	9.73	3.48	2.59	4.14	4.14	5.32	8.21667	3.934
ENSRNOG00000051450	Abracl	ABRA C-terminal like [Source:RGD Symbol;Acc:1583256]	0.61	-0.713787	2.98841e-05	0.00545482	yes	down	18.86	19.68	19.05	11.6	11.46	14.95	15.41	11.77	19.1967	13.038
ENSRNOG00000047737	Rpl7a	ribosomal protein L7a [Source:RGD Symbol;Acc:1307586]	0.537	-0.898002	3.23232e-05	0.00567879	yes	down	247.29	193.11	150.63	102.41	132.98	88.59	159.97	112.64	197.01	119.318
ENSRNOG00000027503	Rps25	ribosomal protein s25 [Source:RGD Symbol;Acc:621043]	0.683	-0.550888	3.2273e-05	0.00567879	yes	down	749.76	632.26	622.2	452.01	458.27	540.32	565.05	466.51	668.073	496.432
ENSRNOG00000034237	LOC103694404	60S ribosomal protein L39 [Source:RGD Symbol;Acc:9200697]	0.646	-0.629585	3.28969e-05	0.00570823	yes	down	277.97	323.98	282.38	174.35	201.77	265.21	232.09	182.88	294.777	211.26
ENSRNOG00000043328	Chmp2a	charged multivesicular body protein 2A [Source:RGD Symbol;Acc:1305050]	0.67	-0.576903	3.40191e-05	0.00583096	yes	down	67.78	61.2	54.17	41.16	42.61	46.59	50.34	47.93	61.05	45.726
ENSRNOG00000011683	Fes	FES proto-oncogene, tyrosine kinase [Source:RGD Symbol;Acc:1564385]	0.609	-0.715358	3.74239e-05	0.00626216	yes	down	5.95	7.75	4.64	4.02	3.51	4.22	4.7	4.07	6.11333	4.104
ENSRNOG00000020456	Nucb2	nucleobindin 2 [Source:RGD Symbol;Acc:620888]	0.629	-0.668451	3.8317e-05	0.00626216	yes	down	8.98	9.43	8.24	6.66	4.95	5.66	8.15	5.73	8.88333	6.23
ENSRNOG00000005116	LOC108350502	40S ribosomal protein S2 pseudogene [Source:RGD Symbol;Acc:11403788]	0.68	-0.556054	4.04312e-05	0.00653173	yes	down	138.67	142.07	114.81	101.97	91.68	108.17	116.46	81.26	131.85	99.908
ENSRNOG00000049491	LOC108348139	class II histocompatibility antigen, M beta 1 chain [Source:RGD Symbol;Acc:11469141]	0.56	-0.836734	4.33005e-05	0.00691578	yes	down	25.29	31.19	23.04	14.72	11.76	17.93	23.04	13.13	26.5067	16.116
ENSRNOG00000031506	Ftl1	ferritin light chain 1 [Source:RGD Symbol;Acc:61813]	0.568	-0.816921	5.10102e-05	0.00770912	yes	down	1704.38	1569.76	1337.45	839.22	695.11	1115.83	1346.22	889.36	1537.2	977.148
ENSRNOG00000030628	Eif4a1	eukaryotic translation initiation factor 4A1 [Source:RGD Symbol;Acc:735141]	0.837	-0.256637	5.06571e-05	0.00770912	yes	down	123.3	151.38	130.62	127.01	119.29	119.36	137.96	122.57	135.1	125.238
ENSRNOG00000006460	Amdhd2	amidohydrolase domain containing 2 [Source:RGD Symbol;Acc:1304601]	0.617	-0.695878	5.37949e-05	0.00798635	yes	down	11.76	13.37	9.61	7.13	6.85	8.96	9.56	7.23	11.58	7.946
ENSRNOG00000011463	Psmb2	proteasome subunit beta 2 [Source:RGD Symbol;Acc:61874]	0.733	-0.447213	6.12236e-05	0.00869189	yes	down	94.97	92.13	84.55	68.24	80.14	69.04	76.69	76.36	90.55	74.094
ENSRNOG00000015354	Aox1	aldehyde oxidase 1 [Source:RGD Symbol;Acc:620528]	0.622	-0.684747	6.08152e-05	0.00869189	yes	down	14.82	17.01	16.89	7.19	8.38	9.26	9.86	13.42	16.24	9.622
ENSRNOG00000050016	Gtf3a	general transcription factor III A [Source:RGD Symbol;Acc:619746]	0.722	-0.46957	6.19609e-05	0.0087086	yes	down	21.33	22.95	21.79	16.48	16.96	16.36	20.79	17.92	22.0233	17.702
ENSRNOG00000001339	Psmd9	proteasome 26S subunit, non-ATPase 9 [Source:RGD Symbol;Acc:621110]	0.558	-0.841098	6.4352e-05	0.00895513	yes	down	194	170.06	120.41	118.18	106.01	69.99	82.21	110.05	161.49	97.288
ENSRNOG00000009378	Rpl4	ribosomal protein L4 [Source:RGD Symbol;Acc:619824]	0.732	-0.450408	6.58189e-05	0.00902349	yes	down	479.12	443.98	427.99	358.79	334.67	387.76	398.94	360.89	450.363	368.21
ENSRNOG00000003201	Rps4x	ribosomal protein S4, X-linked [Source:RGD Symbol;Acc:2324318]	0.681	-0.553621	6.61849e-05	0.00902349	yes	down	432.73	410.59	317.47	295.8	267.06	334.63	331.03	268.79	386.93	299.462
ENSRNOG00000038218	Ndufc1	NADH:ubiquinone oxidoreductase subunit C1 [Source:RGD Symbol;Acc:1586362]	0.603	-0.730224	6.8361e-05	0.00915061	yes	down	67.16	58.62	54.27	49.72	63.53	46.88	55.36	43.37	60.0167	51.772
ENSRNOG00000034246	Rps27a	ribosomal protein S27a [Source:RGD Symbol;Acc:6489478]	0.724	-0.466018	7.13971e-05	0.00937838	yes	down	542.87	495.04	456.12	399.55	368.59	399.77	445.09	402.24	498.01	403.048
ENSRNOG00000056765	Rpl10	ribosomal protein L10 [Source:RGD Symbol;Acc:621178]	0.637	-0.649843	7.26518e-05	0.00945482	yes	down	651.41	546.59	428.88	368.96	353.26	407.68	460.77	345.02	542.293	387.138
ENSRNOG00000023830	Dnase2	deoxyribonuclease 2, lysosomal [Source:RGD Symbol;Acc:621457]	0.51	-0.97111	7.52131e-05	0.00969835	yes	down	45.88	52.76	42.39	24.94	16.99	32.31	39.67	19.61	47.01	26.704
ENSRNOG00000038445	Rnf225	ring finger protein 225 [Source:RGD Symbol;Acc:1561909]	0.366	-1.45065	7.7834e-05	0.00986016	yes	down	4.13	3.22	1.48	1.5	1.16	0.98	1.41	0.95	2.94333	1.2
ENSRNOG00000014464	Tnfsf13b	TNF superfamily member 13b [Source:RGD Symbol;Acc:1561519]	0.504	-0.987367	7.85726e-05	0.00986016	yes	down	4.14	5.77	4.31	2.41	1.79	2.58	3.84	2.65	4.74	2.654
ENSRNOG00000018320	Rps15a	ribosomal protein S15a [Source:RGD Symbol;Acc:619939]	0.571	-0.808396	7.98457e-05	0.00993028	yes	down	539.97	354.8	292.1	226.94	229.95	268.89	276.72	247.11	395.623	249.922
ENSRNOG00000003291	Creg1	cellular repressor of E1A-stimulated genes 1 [Source:RGD Symbol;Acc:1306804]	0.653	-0.614629	8.26489e-05	0.0100141	yes	down	38.81	39.79	28.44	27.28	21.88	28.98	28.35	22.95	35.68	25.888
ENSRNOG00000037247	Rras	RAS related [Source:RGD Symbol;Acc:1311443]	0.65	-0.622539	8.24765e-05	0.0100141	yes	down	42.62	37.16	36.46	26.29	24.46	28.87	34.77	26.72	38.7467	28.222
ENSRNOG00000020845	Tyrobp	Tyro protein tyrosine kinase binding protein [Source:RGD Symbol;Acc:1303081]	0.475	-1.07291	8.35605e-05	0.010038	yes	down	224.58	276.06	243.51	111.81	66.75	180.5	177.36	116.82	248.05	130.648
ENSRNOG00000002632	Naca	nascent polypeptide associated complex subunit alpha [Source:RGD Symbol;Acc:1308642]	0.775	-0.368365	8.53283e-05	0.010057	yes	down	309.18	311.19	269.71	249.7	241.56	262.4	246.51	245.03	296.693	249.04
ENSRNOG00000026644	Glipr1	GLI pathogenesis-related 1 [Source:RGD Symbol;Acc:1305978]	0.436	-1.19646	8.75351e-05	0.010057	yes	down	10.7	13.56	7.75	4.58	3.3	7.4	6.52	3.86	10.67	5.132
ENSRNOG00000051531	Ctu2	cytosolic thiouridylase subunit 2 [Source:RGD Symbol;Acc:1562594]	0.546	-0.873335	8.47609e-05	0.010057	yes	down	8.69	7.57	4.93	3.97	3.97	4.34	4.95	4.32	7.06333	4.31
ENSRNOG00000020674	Rpl27	ribosomal protein L27 [Source:RGD Symbol;Acc:621192]	0.639	-0.646293	8.7786e-05	0.010057	yes	down	468.3	363.81	327.75	251.66	261.36	295.9	310.96	274.21	386.62	278.818
ENSRNOG00000042233	Rpl41	ribosomal protein L41 [Source:RGD Symbol;Acc:621210]	0.754	-0.406574	9.34908e-05	0.0105969	yes	down	919.42	908.86	894.17	732.37	683.07	776.68	870.68	741.26	907.483	760.812
ENSRNOG00000046452	Fcgr2b	Fc fragment of IgG receptor IIb [Source:RGD Symbol;Acc:631331]	0.428	-1.22418	9.75003e-05	0.0108759	yes	down	53.7	73.59	50.74	23.1	14.95	40.61	42.96	20.67	59.3433	28.458
ENSRNOG00000020150	Il18bp	interleukin 18 binding protein [Source:RGD Symbol;Acc:620042]	0.579	-0.788677	0.00010311	0.0114111	yes	down	10.42	12.11	10.03	5.68	6.15	7.88	9.06	6.14	10.8533	6.982
ENSRNOG00000034130	LOC108349189	high mobility group protein B1 pseudogene [Source:RGD Symbol;Acc:11468204]	0.741	-0.432181	0.000105064	0.0114493	yes	down	85.34	96.45	92.87	69.74	88.85	67.5	79.19	71.99	91.5533	75.454
ENSRNOG00000005689	Yeats4	YEATS domain containing 4 [Source:RGD Symbol;Acc:1305741]	0.716	-0.481058	0.000110355	0.0117208	yes	down	16.19	19.59	14.87	12.38	13.67	14.41	13.66	12.76	16.8833	13.376
ENSRNOG00000054626	Rps8	ribosomal protein S8 [Source:RGD Symbol;Acc:61910]	0.671	-0.575016	0.000110912	0.0117208	yes	down	529.14	458.32	377.33	319.08	304	347.64	379.43	357.11	454.93	341.452
ENSRNOG00000004555	Sec14l3	SEC14-like lipid binding 3 [Source:RGD Symbol;Acc:620812]	0.305	-1.71378	0.000113037	0.0118356	yes	down	94.19	59.83	46.07	24.46	21.32	14.34	15.31	38.47	66.6967	22.78
ENSRNOG00000053110	AABR07045047.1	-	0.326	-1.61925	0.000119978	0.0123087	yes	down	7.2	15.5	4.06	3.27	1.52	3.48	3.16	4.1	8.92	3.106
ENSRNOG00000061272	AABR07011996.1	-	0.686	-0.543245	0.000123251	0.0124599	yes	down	11.91	16.17	11.56	10.65	9.78	11.04	10.9	7.65	13.2133	10.004
ENSRNOG00000026716	LOC100360449	ribosomal protein L9-like [Source:RGD Symbol;Acc:2322107]	0.681	-0.553265	0.000124112	0.0124599	yes	down	179.97	183.06	141.61	132.75	104.55	143.65	134.29	119.81	168.213	127.01
ENSRNOG00000011413	Scp2	sterol carrier protein 2 [Source:RGD Symbol;Acc:3642]	0.774	-0.369577	0.000132302	0.0130784	yes	down	93.27	91.47	85.76	78.44	79.68	76.06	88.49	67.13	90.1667	77.96
ENSRNOG00000050827	NEWGENE_1310561	programmed cell death 5 [Source:RGD Symbol;Acc:11480964]	0.527	-0.92355	0.000131477	0.0130784	yes	down	59.65	58.5	64.79	37.97	36.7	23.81	29.79	50.73	60.98	35.8
ENSRNOG00000021412	Slfn13	schlafen family member 13 [Source:RGD Symbol;Acc:1359139]	0.467	-1.09822	0.000137716	0.0130784	yes	down	12.92	17.63	15.72	6.51	3.97	11.95	8.7	6.7	15.4233	7.566
ENSRNOG00000057347	Cebpb	CCAAT/enhancer binding protein beta [Source:RGD Symbol;Acc:2327]	0.389	-1.36283	0.000136218	0.0130784	yes	down	16.55	9.51	7	2.88	3.81	5.81	6.48	5.34	11.02	4.864
ENSRNOG00000037540	Tmem256	transmembrane protein 256 [Source:RGD Symbol;Acc:1563438]	0.69	-0.534647	0.000136852	0.0130784	yes	down	41.53	49.61	71.57	49.03	47.54	45.92	49.33	39.56	54.2367	46.276
ENSRNOG00000026260	Rpl11	ribosomal protein L11 [Source:RGD Symbol;Acc:1308681]	0.717	-0.47954	0.000144411	0.0135314	yes	down	480.02	471.68	380.63	358.25	309.21	371.29	399.49	330.5	444.11	353.748
ENSRNOG00000019041	Psme1	proteasome activator subunit 1 [Source:RGD Symbol;Acc:3429]	0.596	-0.74713	0.0001496	0.0139247	yes	down	87.81	94.57	94.44	62.31	43.1	64.76	86.7	50.12	92.2733	61.398
ENSRNOG00000019106	Rps17	ribosomal protein S17 [Source:RGD Symbol;Acc:62027]	0.661	-0.596724	0.000151468	0.0140058	yes	down	587.54	514.4	436.67	370.49	330.53	394.66	474.8	331.59	512.87	380.414
ENSRNOG00000028505	Rps18l1	ribosomal protein S18-like 1 [Source:RGD Symbol;Acc:2321678]	0.692	-0.531766	0.000161222	0.0146445	yes	down	418.08	343.86	382.71	275.57	271.97	272.7	372.72	315.86	381.55	301.764
ENSRNOG00000016411	Rps12	ribosomal protein S12 [Source:RGD Symbol;Acc:62024]	0.652	-0.617921	0.000165388	0.0149009	yes	down	579.16	569.35	407.19	383.7	296.18	420.63	403.03	371.82	518.567	375.072
ENSRNOG00000046211	Fbxw4	F-box and WD repeat domain containing 4 [Source:RGD Symbol;Acc:1306518]	0.634	-0.657663	0.000169546	0.0150919	yes	down	27.27	26.58	18.64	15.48	14.02	17.71	19.38	18.62	24.1633	17.042
ENSRNOG00000019838	Gmfg	glia maturation factor, gamma [Source:RGD Symbol;Acc:620506]	0.495	-1.0133	0.000169657	0.0150919	yes	down	18.13	23.87	20.08	11.16	6.29	14.78	13.63	10.67	20.6933	11.306
ENSRNOG00000006108	Gngt2	G protein subunit gamma transducin 2 [Source:RGD Symbol;Acc:1591007]	0.364	-1.45724	0.000178548	0.0156843	yes	down	11.17	11.41	10.7	3.3	2.05	5.73	7.55	3.97	11.0933	4.52
ENSRNOG00000024159	Fcer1g	Fc fragment of IgE receptor Ig [Source:RGD Symbol;Acc:2599]	0.469	-1.09268	0.000182243	0.0159095	yes	down	409.23	458.43	448.98	210.21	104.09	296.66	337.54	197.9	438.88	229.28
ENSRNOG00000010208	Timp1	TIMP metallopeptidase inhibitor 1 [Source:RGD Symbol;Acc:621675]	0.402	-1.31591	0.000188201	0.0163281	yes	down	86.1	119.93	61.81	27.75	17.9	52.71	66.12	32.55	89.28	39.406
ENSRNOG00000025184	Prss35	serine protease 35 [Source:RGD Symbol;Acc:1311282]	0.525	-0.928685	0.000189555	0.0163448	yes	down	8.58	5.54	5.12	3.92	2.94	3.88	4.81	3.52	6.41333	3.814
ENSRNOG00000016507	LOC687679	similar to small nuclear ribonucleoprotein polypeptide G [Source:RGD Symbol;Acc:1583028]	0.681	-0.55329	0.000191947	0.0164501	yes	down	56.9	60.48	65.22	41.08	42.6	49.89	49.54	47.66	60.8667	46.154
ENSRNOG00000018454	Apoe	apolipoprotein E [Source:RGD Symbol;Acc:2138]	0.495	-1.01393	0.000201289	0.0169408	yes	down	7229.18	8706.66	5932.34	3245.2	2217.98	4884.33	6355.76	3338.26	7289.39	4008.31
ENSRNOG00000014064	Ctsh	cathepsin H [Source:RGD Symbol;Acc:2447]	0.621	-0.68822	0.000214126	0.0177032	yes	down	136.85	174.75	138.11	97.15	70.8	111.78	141.54	92.44	149.903	102.742
ENSRNOG00000026616	Ndufb2	NADH:ubiquinone oxidoreductase subunit B2 [Source:RGD Symbol;Acc:1308130]	0.758	-0.399065	0.000218335	0.0179456	yes	down	168.58	166.85	155.54	127.09	151.83	130.7	150.27	132.71	163.657	138.52
ENSRNOG00000016896	Rpl3	ribosomal protein L3 [Source:RGD Symbol;Acc:735105]	0.745	-0.424776	0.000224037	0.0180967	yes	down	428.24	420.43	355.89	313.28	302.19	335.71	386.78	322.57	401.52	332.106
ENSRNOG00000009325	Fuca1	alpha-L-fucosidase 1 [Source:RGD Symbol;Acc:2636]	0.743	-0.429364	0.000234355	0.0184015	yes	down	84.4	100.65	78.23	68.12	62.48	73.16	89.12	68.39	87.76	72.254
ENSRNOG00000007539	Rsad2	radical S-adenosyl methionine domain containing 2 [Source:RGD Symbol;Acc:620495]	0.451	-1.14934	0.000233588	0.0184015	yes	down	7.19	17.8	9.88	4.58	3.52	8.08	7.76	4.38	11.6233	5.664
ENSRNOG00000012640	Dpp7	dipeptidylpeptidase 7 [Source:RGD Symbol;Acc:71073]	0.608	-0.718171	0.000239459	0.0186578	yes	down	109.29	113.64	90.96	60.81	51.09	80.42	98.74	63.48	104.63	70.908
ENSRNOG00000002818	Eftud2	elongation factor Tu GTP binding domain containing 2 [Source:RGD Symbol;Acc:1560116]	0.741	-0.43165	0.000240275	0.0186578	yes	down	54.12	56.79	54.83	59.51	56.23	49.94	50.48	55.76	55.2467	54.384
ENSRNOG00000023463	Parp9	poly (ADP-ribose) polymerase family, member 9 [Source:RGD Symbol;Acc:1307534]	0.601	-0.734459	0.00025752	0.0194594	yes	down	7.43	8.91	9.01	6.68	4.43	6.75	6.22	4.09	8.45	5.634
ENSRNOG00000019196	Xpnpep3	X-prolyl aminopeptidase 3 [Source:RGD Symbol;Acc:1589063]	0.581	-0.783882	0.000254914	0.0194594	yes	down	13.11	10.57	6.57	6.79	6.41	6.79	7.25	5.58	10.0833	6.564
ENSRNOG00000054860	Clec12a	C-type lectin domain family 12, member A [Source:RGD Symbol;Acc:1592991]	0.377	-1.40677	0.000261163	0.0195913	yes	down	16.27	32.16	17.03	10.65	3.65	13.83	11.46	4.76	21.82	8.87
ENSRNOG00000004107	Rpl23	ribosomal protein L23 [Source:RGD Symbol;Acc:62067]	0.749	-0.417757	0.000269824	0.0199786	yes	down	520.51	513.34	496.04	438.86	369.98	447.41	478.54	394.85	509.963	425.928
ENSRNOG00000047076	Oas1i	2 ' -5 ' oligoadenylate synthetase 1I [Source:RGD Symbol;Acc:1359379]	0.527	-0.924836	0.000270733	0.0199786	yes	down	2.42	4.13	4.14	2.1	1.71	2.14	2.19	2.15	3.56333	2.058
ENSRNOG00000016416	Rnh1	ribonuclease/angiogenin inhibitor 1 [Source:RGD Symbol;Acc:621398]	0.723	-0.467707	0.000295218	0.020911	yes	down	44.06	46.7	33.43	30.47	31.96	33.39	38.67	31.87	41.3967	33.272
ENSRNOG00000045854	Zfp277	zinc finger protein 277 [Source:RGD Symbol;Acc:1583856]	0.769	-0.378626	0.000287298	0.020911	yes	down	61.47	64.14	60.97	52.98	48.82	54.19	58.7	47.14	62.1933	52.366
ENSRNOG00000008140	Rpl15	ribosomal protein L15 [Source:RGD Symbol;Acc:621181]	0.712	-0.490614	0.000301581	0.0211936	yes	down	111.32	105.29	102.11	79.68	70.67	89.96	101.98	80.44	106.24	84.546
ENSRNOG00000025040	Gng10	G protein subunit gamma 10 [Source:RGD Symbol;Acc:621514]	0.739	-0.436258	0.000310637	0.0214887	yes	down	57.35	81.67	55.62	52.95	48.23	54	61.97	46.77	64.88	52.784
ENSRNOG00000060853	Iah1	isoamyl acetate hydrolyzing esterase 1 [Source:RGD Symbol;Acc:727866]	0.735	-0.44497	0.000310576	0.0214887	yes	down	32	36.39	26.41	24.2	26.44	25.42	26.6	25.91	31.6	25.714
ENSRNOG00000010189	Rps24	ribosomal protein S24 [Source:RGD Symbol;Acc:621040]	0.773	-0.370711	0.000313501	0.0214939	yes	down	484.84	535.91	421.5	419.63	383.88	439.15	436.84	373.04	480.75	410.508
ENSRNOG00000018795	Rpl18a	ribosomal protein L18A [Source:RGD Symbol;Acc:1302976]	0.619	-0.692694	0.000324088	0.0219164	yes	down	769.68	537.58	455.14	390.15	366.34	414.54	451.53	424.67	587.467	409.446
ENSRNOG00000038835	Cd86	CD86 molecule [Source:RGD Symbol;Acc:628714]	0.487	-1.03942	0.000327784	0.0219765	yes	down	12.1	17.76	8.52	6.43	4.1	9.51	9.77	6.35	12.7933	7.232
ENSRNOG00000018487	Slc3a2	solute carrier family 3 member 2 [Source:RGD Symbol;Acc:3073]	0.776	-0.36596	0.000344952	0.0222711	yes	down	113.08	125.03	107.01	93.15	92.91	94.14	122.86	93.72	115.04	99.356
ENSRNOG00000014202	Snx20	sorting nexin 20 [Source:RGD Symbol;Acc:1307787]	0.513	-0.96277	0.000340344	0.0222711	yes	down	4.67	6.39	3.77	2.42	2.28	3.81	3.1	2.33	4.94333	2.788
ENSRNOG00000007650	Cd63	Cd63 molecule [Source:RGD Symbol;Acc:62080]	0.568	-0.815844	0.000365832	0.0222711	yes	down	257.43	304.84	256.52	152.59	117.37	209.76	255.7	127.16	272.93	172.516
ENSRNOG00000013110	Nudt2	nudix hydrolase 2 [Source:RGD Symbol;Acc:1303023]	0.736	-0.44272	0.000372591	0.0222711	yes	down	92.22	92.71	68.85	67.83	71.17	67.8	70.39	68.86	84.5933	69.21
ENSRNOG00000060325	Lefty2	Left-right determination factor 2 [Source:RGD Symbol;Acc:1359679]	0.185	-2.43683	0.000350784	0.0222711	yes	down	298.24	173.02	126.17	54.09	36.51	16.73	16.1	82.33	199.143	41.152
ENSRNOG00000015906	Tgif1	TGFB-induced factor homeobox 1 [Source:RGD Symbol;Acc:1310517]	0.587	-0.767495	0.000355543	0.0222711	yes	down	8.68	11.54	7.28	5.29	4.67	7.34	7.14	5.22	9.16667	5.932
ENSRNOG00000016271	Itm2b	integral membrane protein 2B [Source:RGD Symbol;Acc:620727]	0.751	-0.412196	0.000365519	0.0222711	yes	down	574.48	682.61	510.26	457.52	442.29	525.26	590.38	437.75	589.117	490.64
ENSRNOG00000002032	Ifngr2	interferon gamma receptor 2 [Source:RGD Symbol;Acc:1307532]	0.732	-0.449715	0.000371816	0.0222711	yes	down	24.1	29.29	24.23	20.6	18.5	23.57	24.68	17.65	25.8733	21
ENSRNOG00000023385	Rpl37a	ribosomal protein L37a [Source:RGD Symbol;Acc:2319947]	0.674	-0.568785	0.00034993	0.0222711	yes	down	172.38	156.52	118.13	121.63	105.69	124.35	106.73	101.32	149.01	111.944
ENSRNOG00000011663	Rnf7	ring finger protein 7 [Source:RGD Symbol;Acc:1311048]	0.704	-0.506385	0.00036754	0.0222711	yes	down	28.94	27.6	22.23	18.7	23.22	19.83	22.06	19.26	26.2567	20.614
ENSRNOG00000050660	LOC100911713	protein C10-like [Source:RGD Symbol;Acc:6491258]	0.497	-1.00971	0.000366517	0.0222711	yes	down	119.93	74.65	57.77	46.83	43.71	37.71	46.48	60.99	84.1167	47.144
ENSRNOG00000020636	Spint2	serine peptidase inhibitor, Kunitz type, 2 [Source:RGD Symbol;Acc:735123]	0.548	-0.867011	0.000359851	0.0222711	yes	down	41.63	30	29.48	18.77	16.28	17.68	32.43	18.37	33.7033	20.706
ENSRNOG00000028566	Pld4	phospholipase D family, member 4 [Source:RGD Symbol;Acc:1598308]	0.624	-0.680564	0.000372159	0.0222711	yes	down	65.5	96.1	78.85	49.09	37.21	65.1	70.02	53.96	80.15	55.076
ENSRNOG00000011260	Cmbl	carboxymethylenebutenolidase homolog [Source:RGD Symbol;Acc:1306952]	0.728	-0.457375	0.000360377	0.0222711	yes	down	35.43	45.89	32.62	31.62	30.45	32.15	34.11	24.47	37.98	30.56
ENSRNOG00000021424	Cd300lf	Cd300 molecule-like family member F [Source:RGD Symbol;Acc:1309733]	0.564	-0.825142	0.000341612	0.0222711	yes	down	4.76	7.62	6.3	3.65	3.44	4.74	6.1	4.23	6.22667	4.432
ENSRNOG00000028668	Slc28a2	solute carrier family 28 member 2 [Source:RGD Symbol;Acc:61840]	0.558	-0.842376	0.000365707	0.0222711	yes	down	2.34	2.28	2.97	1.63	1.83	1.62	1.33	1.46	2.53	1.574
ENSRNOG00000021035	Rpl18	ribosomal protein L18 [Source:RGD Symbol;Acc:621182]	0.678	-0.560188	0.000378033	0.0224188	yes	down	308.49	248.63	217.31	172.83	178.28	184.44	219.01	195.3	258.143	189.972
ENSRNOG00000047854	RT1-DMa	RT1 class II, locus DMa [Source:RGD Symbol;Acc:735053]	0.507	-0.979305	0.000384482	0.0226105	yes	down	57.76	61.98	45.62	27.91	20.15	35.77	51.44	20.9	55.12	31.234
ENSRNOG00000023428	Pik3r5	phosphoinositide-3-kinase, regulatory subunit 5 [Source:RGD Symbol;Acc:1563261]	0.472	-1.082	0.000389547	0.0228129	yes	down	4.61	5.05	3.13	2	1.05	2.66	3.03	2.41	4.26333	2.23
ENSRNOG00000001314	Fam20c	FAM20C, golgi associated secretory pathway kinase [Source:RGD Symbol;Acc:1311980]	0.625	-0.677977	0.000398401	0.0232346	yes	down	35.89	33.33	25.29	21.47	17	21.05	30.55	20.16	31.5033	22.046
ENSRNOG00000013889	Tmed3	transmembrane p24 trafficking protein 3 [Source:RGD Symbol;Acc:1303327]	0.74	-0.435084	0.000400493	0.02326	yes	down	28.1	34.15	26.48	21.96	24.27	26.55	27.92	20.48	29.5767	24.236
ENSRNOG00000057879	AABR07044408.2	-	0.466	-1.10285	0.00040746	0.0233749	yes	down	273.05	517.16	271.37	166.3	91.1	290.16	193.3	231.25	353.86	194.422
ENSRNOG00000021199	Fcgr1a	Fc fragment of IgG receptor Ia [Source:RGD Symbol;Acc:1309912]	0.603	-0.729116	0.000406462	0.0233749	yes	down	7.65	11.28	8.77	7.39	4.65	6.26	7.28	5.09	9.23333	6.134
ENSRNOG00000021100	Tnfaip8l2	TNF alpha induced protein 8 like 2 [Source:RGD Symbol;Acc:1310519]	0.534	-0.90616	0.000416104	0.0234536	yes	down	16.26	21.91	16.26	9.31	6.57	14.22	14.63	8.72	18.1433	10.69
ENSRNOG00000029810	LOC100911766	tetraspanin-4-like [Source:RGD Symbol;Acc:6490894]	0.528	-0.92167	0.000420513	0.0234536	yes	down	17.64	19.07	11.53	8.28	7.84	11.26	13.65	6.26	16.08	9.458
ENSRNOG00000011559	Cnn3	calponin 3 [Source:RGD Symbol;Acc:71044]	0.702	-0.511292	0.00041575	0.0234536	yes	down	207.04	283.18	186.37	170.71	144.3	177.81	223.56	156.03	225.53	174.482
ENSRNOG00000018958	Mt3	metallothionein 3 [Source:RGD Symbol;Acc:621252]	0.676	-0.565635	0.000426716	0.0236122	yes	down	1242.98	1121.61	804.45	748.06	738.73	893.64	824.85	773.37	1056.35	795.73
ENSRNOG00000050794	Pdlim4	PDZ and LIM domain 4 [Source:RGD Symbol;Acc:3575]	0.622	-0.685389	0.000446448	0.0246072	yes	down	98.93	121.28	85.65	57.97	51.1	87.41	89.35	66.38	101.953	70.442
ENSRNOG00000019007	Rpl14	ribosomal protein L14 [Source:RGD Symbol;Acc:621180]	0.66	-0.598391	0.000457721	0.0250322	yes	down	388.94	299.79	246.78	217.09	224.4	240.05	261.68	214.39	311.837	231.522
ENSRNOG00000017693	Slc2a5	solute carrier family 2 member 5 [Source:RGD Symbol;Acc:68328]	0.59	-0.7608	0.000471726	0.0255989	yes	down	20.91	20.53	15.37	10.74	9.21	14.45	15.11	12.53	18.9367	12.408
ENSRNOG00000046050	Dennd1c	DENN/MADD domain containing 1C [Source:MGI Symbol;Acc:MGI:1918035]	0.636	-0.653116	0.000475182	0.0256347	yes	down	6.59	6.58	4.97	3.86	4.04	5.22	4.16	4.07	6.04667	4.27
ENSRNOG00000024689	Hopx	HOP homeobox [Source:RGD Symbol;Acc:621841]	0.758	-0.399192	0.000476034	0.0256347	yes	down	145.37	177.22	118.55	119.77	118.38	127.52	137.88	110.21	147.047	122.752
ENSRNOG00000058766	AABR07019341.2	-	0.317	-1.65803	0.000477996	0.0256421	yes	down	3.18	6.29	1.72	1.35	0.6	1.5	1.63	1.28	3.73	1.272
ENSRNOG00000019387	Ifi30	IFI30, lysosomal thiol reductase [Source:RGD Symbol;Acc:1310758]	0.517	-0.95201	0.000487982	0.0259795	yes	down	62.85	87.35	81.16	40.79	22.71	58.26	61.73	36.98	77.12	44.094
ENSRNOG00000004741	Rpl19	ribosomal protein L19 [Source:RGD Symbol;Acc:621183]	0.729	-0.455795	0.000496248	0.0262209	yes	down	780.04	664.54	637	547.54	517.38	560.7	648.09	562.33	693.86	567.208
ENSRNOG00000027028	Lamtor4	late endosomal/lysosomal adaptor, MAPK and MTOR activator 4 [Source:RGD Symbol;Acc:1309735]	0.699	-0.516018	0.000505962	0.0266341	yes	down	102.04	83.72	78.76	66.75	66.64	69.04	73	70.28	88.1733	69.142
ENSRNOG00000047905	Dus1l	dihydrouridine synthase 1-like [Source:RGD Symbol;Acc:708389]	0.704	-0.506854	0.00053471	0.02765	yes	down	23.51	23.26	20.18	20.24	17.24	15.63	15.94	18.69	22.3167	17.548
ENSRNOG00000002273	Naaa	N-acylethanolamine acid amidase [Source:RGD Symbol;Acc:1307267]	0.66	-0.598667	0.000533576	0.02765	yes	down	21.47	27.97	17.66	16.54	14.35	17.43	20.71	12.54	22.3667	16.314
ENSRNOG00000032348	LOC103690996	uncharacterized LOC103690996 [Source:RGD Symbol;Acc:9247033]	0.725	-0.464247	0.000538401	0.0277188	yes	down	375.56	325.49	354.56	253.97	282.26	281.15	332.94	281	351.87	286.264
ENSRNOG00000030747	Rpl38	ribosomal protein L38 [Source:RGD Symbol;Acc:1305573]	0.68	-0.555838	0.000542868	0.0278468	yes	down	525	521.17	404.83	344.18	379.52	450.4	345.46	308.99	483.667	365.71
ENSRNOG00000005718	AABR07065406.1	-	0.712	-0.490351	0.000547707	0.0279928	yes	down	47.18	42.14	44.07	26.35	35.87	31.76	36.95	33.2	44.4633	32.826
ENSRNOG00000005203	Sec61g	Sec61 translocon gamma subunit [Source:RGD Symbol;Acc:1596170]	0.639	-0.645211	0.000555566	0.0281414	yes	down	87.06	79.82	54.03	49.44	58.84	49.95	59.15	46.05	73.6367	52.686
ENSRNOG00000052620	Rack1	receptor for activated C kinase 1 [Source:RGD Symbol;Acc:69229]	0.671	-0.575837	0.00055662	0.0281414	yes	down	269.25	244.75	170.19	151	156.57	177.53	201.99	166.59	228.063	170.736
ENSRNOG00000012749	C1qb	complement C1q B chain [Source:RGD Symbol;Acc:2229]	0.458	-1.12711	0.00056308	0.0282822	yes	down	242.18	310.81	225.12	116.98	56.98	160.17	227.36	97.98	259.37	131.894
ENSRNOG00000017250	Gmpr	guanosine monophosphate reductase [Source:RGD Symbol;Acc:70980]	0.763	-0.390609	0.000563431	0.0282822	yes	down	63.08	75.96	59.57	52.96	48.67	62.54	61.29	53.83	66.2033	55.858
ENSRNOG00000018007	Gtf2h5	general transcription factor IIH subunit 5 [Source:RGD Symbol;Acc:1560991]	0.746	-0.423645	0.000573714	0.0286959	yes	down	28.07	26.98	23.21	22.52	21.38	22.46	21.81	20.17	26.0867	21.668
ENSRNOG00000006789	Ddit3	DNA-damage inducible transcript 3 [Source:RGD Symbol;Acc:62391]	0.734	-0.445757	0.000580201	0.0287283	yes	down	26.85	27.63	23.46	20.92	22.29	21.84	20.69	19.98	25.98	21.144
ENSRNOG00000031273	AABR07034639.1	-	0.576	-0.7951	0.000576918	0.0287283	yes	down	340	255.08	154.33	162.5	156.82	162.08	158.2	166.88	249.803	161.296
ENSRNOG00000013190	Rnaset2	ribonuclease T2 [Source:RGD Symbol;Acc:1309918]	0.57	-0.812038	0.000580494	0.0287283	yes	down	212.67	275.46	234.16	139.92	86.11	191.95	204.95	135.74	240.763	151.734
ENSRNOG00000009205	Lmo4	LIM domain only 4 [Source:RGD Symbol;Acc:1305670]	0.707	-0.499913	0.000595783	0.0292788	yes	down	45.11	57	46.74	35.37	30.78	40.5	48.62	33.98	49.6167	37.85
ENSRNOG00000004196	LOC108350501	40S ribosomal protein S29 [Source:RGD Symbol;Acc:11433440]	0.661	-0.596995	0.000614092	0.0298145	yes	down	1173.42	1197.18	713.24	770.06	721.94	847.93	775.02	654.4	1027.95	753.87
ENSRNOG00000020595	Rps11	ribosomal protein S11 [Source:RGD Symbol;Acc:621026]	0.742	-0.429883	0.00061517	0.0298145	yes	down	480.09	428.15	426.14	336.76	334.76	369.96	414.81	385.74	444.793	368.406
ENSRNOG00000013631	Slc31a2	solute carrier family 31 member 2 [Source:RGD Symbol;Acc:1307963]	0.686	-0.544483	0.000611043	0.0298145	yes	down	7.6	7.34	7.52	5.38	6.65	5.48	5.96	5.18	7.48667	5.73
ENSRNOG00000019264	Ltbr	lymphotoxin beta receptor [Source:RGD Symbol;Acc:1309448]	0.627	-0.673191	0.000624709	0.0298649	yes	down	42.06	35.62	28.88	21.1	21.69	28.27	32.87	21.14	35.52	25.014
ENSRNOG00000034266	Ccdc63	coiled-coil domain containing 63 [Source:RGD Symbol;Acc:1562334]	0.563	-0.829268	0.000622589	0.0298649	yes	down	19.15	23.19	14.06	9.66	7.94	15.85	15.05	9.96	18.8	11.692
ENSRNOG00000021828	Coro1b	coronin 1B [Source:RGD Symbol;Acc:2382]	0.823	-0.281248	0.000636547	0.0303277	yes	down	74.03	79.25	71.74	65.38	66.65	66.59	78.78	66.57	75.0067	68.794
ENSRNOG00000023708	Tmem176a	transmembrane protein 176A [Source:RGD Symbol;Acc:1310725]	0.54	-0.887813	0.0006579	0.0308376	yes	down	306.63	383.6	289.3	162.36	104.44	269.72	255.62	182.51	326.51	194.93
ENSRNOG00000055023	AABR07006258.2	-	0.722	-0.470495	0.000656564	0.0308376	yes	down	60.74	60.27	90.72	58.73	59.84	55.27	60.14	81.64	70.5767	63.124
ENSRNOG00000058841	Bag5l1	BCL2-associated athanogene 5-like 1 [Source:RGD Symbol;Acc:9457021]	0.715	-0.484967	0.00065822	0.0308376	yes	down	17.39	23.95	22.99	17.76	20.18	16.73	15.53	14.38	21.4433	16.916
ENSRNOG00000019453	Rps5	ribosomal protein S5 [Source:RGD Symbol;Acc:3601]	0.638	-0.649358	0.000661259	0.0308771	yes	down	284.25	244.42	157.56	157.74	142.12	163.42	187.89	163.96	228.743	163.026
ENSRNOG00000019201	Naxe	NAD(P)HX epimerase [Source:RGD Symbol;Acc:1304699]	0.722	-0.470805	0.000688643	0.0316166	yes	down	41.19	39.12	34.45	27.36	32.08	29.26	33.68	32.63	38.2533	31.002
ENSRNOG00000015078	Ifitm3	interferon induced transmembrane protein 3 [Source:RGD Symbol;Acc:1595844]	0.502	-0.993781	0.000686399	0.0316166	yes	down	111.95	141.83	156.5	68.28	43.18	88.09	129.44	54.64	136.76	76.726
ENSRNOG00000013973	Lcn2	lipocalin 2 [Source:RGD Symbol;Acc:69408]	0.574	-0.801531	0.000685928	0.0316166	yes	down	7.77	9.96	9.67	4.76	4.74	7.69	6.51	5.27	9.13333	5.794
ENSRNOG00000020678	Ifi35	interferon-induced protein 35 [Source:RGD Symbol;Acc:1304553]	0.539	-0.892928	0.000692836	0.0316166	yes	down	11.44	9.86	6.27	6.31	4.6	4.57	6.67	5.54	9.19	5.538
ENSRNOG00000014214	Rpl27a	ribosomal protein L27a [Source:RGD Symbol;Acc:1309771]	0.735	-0.444359	0.000692844	0.0316166	yes	down	155.37	143.78	147.75	106.8	115.91	138.24	136.29	114.98	148.967	122.444
ENSRNOG00000024603	Rps15	ribosomal protein S15 [Source:RGD Symbol;Acc:62026]	0.61	-0.712221	0.000682002	0.0316166	yes	down	742.63	525.73	418.93	318.7	346.98	413.74	448.12	406.19	562.43	386.746
ENSRNOG00000018671	Commd4	COMM domain containing 4 [Source:RGD Symbol;Acc:1306104]	0.691	-0.534136	0.000702176	0.0318358	yes	down	63.06	59.16	53.12	36.66	46.18	46.07	49.62	52.21	58.4467	46.148
ENSRNOG00000050210	RT1-CE10	RT1 class I, locus CE10 [Source:RGD Symbol;Acc:1359292]	0.54	-0.888428	0.000708955	0.0319801	yes	down	41.98	57.05	58.68	21.39	21.23	36.25	50.12	29.84	52.57	31.766
ENSRNOG00000019704	Resp18	regulated endocrine-specific protein 18 [Source:RGD Symbol;Acc:3555]	0.813	-0.2979	0.00071372	0.0319801	yes	down	305.97	323.91	291.14	270.06	272.36	263.89	281.78	297.45	307.007	277.108
ENSRNOG00000021781	Camk1	calcium/calmodulin-dependent protein kinase I [Source:RGD Symbol;Acc:629473]	0.637	-0.650332	0.000714131	0.0319801	yes	down	17.63	12.86	11.16	9.54	9.85	9.51	11.4	9.49	13.8833	9.958
ENSRNOG00000048199	Rps19l2	ribosomal protein S19-like2 [Source:RGD Symbol;Acc:68440]	0.631	-0.664325	0.00071446	0.0319801	yes	down	428.13	356.18	299.89	186.07	241.98	240.06	314.11	296.99	361.4	255.842
ENSRNOG00000050697	Ctsz	cathepsin Z [Source:RGD Symbol;Acc:708479]	0.545	-0.875618	0.000724253	0.0322132	yes	down	99.38	132.52	92.14	58.37	34.93	82.33	92.41	56.86	108.013	64.98
ENSRNOG00000049075	Fabp5	fatty acid binding protein 5 [Source:RGD Symbol;Acc:70997]	0.639	-0.64557	0.000764024	0.033346	yes	down	254.79	378.72	301.14	187.21	169.15	287.01	271.14	181.79	311.55	219.26
ENSRNOG00000061718	AABR07066871.3	-	0.316	-1.66037	0.00075935	0.033346	yes	down	8.17	18.79	3.46	6.07	2.06	3.04	3.25	2.52	10.14	3.388
ENSRNOG00000027552	Tapbpl	TAP binding protein-like [Source:RGD Symbol;Acc:1307893]	0.708	-0.498336	0.000767118	0.033346	yes	down	13.25	16.59	10.44	10.23	9.68	10.61	12.25	9.72	13.4267	10.498
ENSRNOG00000012778	Magoh	mago homolog, exon junction complex subunit [Source:RGD Symbol;Acc:1305174]	0.665	-0.587948	0.000783129	0.0337445	yes	down	34.56	33.17	29.21	24.12	27.06	27.23	20.75	20.53	32.3133	23.938
ENSRNOG00000003086	Cenpv	centromere protein V [Source:RGD Symbol;Acc:1565681]	0.66	-0.600446	0.000799495	0.0337445	yes	down	22.45	22.12	17.27	11.94	14.94	13.38	16.5	17.39	20.6133	14.83
ENSRNOG00000020982	Fau	FAU, ubiquitin like and ribosomal protein S30 fusion [Source:RGD Symbol;Acc:61938]	0.721	-0.471997	0.000796386	0.0337445	yes	down	584.97	479.79	458.28	390.08	380.04	409.38	474.27	400.94	507.68	410.942
ENSRNOG00000000459	Psmb9	proteasome subunit beta 9 [Source:RGD Symbol;Acc:3427]	0.486	-1.0412	0.000789883	0.0337445	yes	down	11.28	14.35	12.2	5.18	4.09	9.89	9.62	5.11	12.61	6.778
ENSRNOG00000001073	RGD1563482	similar to hypothetical protein FLJ38663 [Source:RGD Symbol;Acc:1563482]	0.681	-0.554265	0.00078942	0.0337445	yes	down	15.5	17.96	10.48	10.69	12.41	9.65	11.02	11.37	14.6467	11.028
ENSRNOG00000013014	Cyba	cytochrome b-245 alpha chain [Source:RGD Symbol;Acc:620573]	0.451	-1.14728	0.000793392	0.0337445	yes	down	69.01	58.74	53.21	22.4	14.99	40.52	51.8	23.69	60.32	30.68
ENSRNOG00000024186	Eef1b2	eukaryotic translation elongation factor 1 beta 2 [Source:RGD Symbol;Acc:1311415]	0.829	-0.269796	0.000819332	0.0343753	yes	down	89.38	98.9	83.41	80.24	84.21	84.63	90.13	77.99	90.5633	83.44
ENSRNOG00000030467	Ube2l6	ubiquitin-conjugating enzyme E2L 6 [Source:RGD Symbol;Acc:1307960]	0.623	-0.683185	0.000832572	0.0348268	yes	down	8.42	10.34	10.74	7.13	5.34	8.32	7.82	5.35	9.83333	6.792
ENSRNOG00000000922	Sumf2	sulfatase modifying factor 2 [Source:RGD Symbol;Acc:1563253]	0.739	-0.436451	0.000835516	0.0348462	yes	down	14.66	15.51	12.56	10.5	11.03	11.98	12.27	9.49	14.2433	11.054
ENSRNOG00000020354	Mrpl23	mitochondrial ribosomal protein L23 [Source:RGD Symbol;Acc:68343]	0.66	-0.598917	0.000841971	0.0350115	yes	down	67.97	51.73	50.12	45.71	40.33	40.93	41.44	41.46	56.6067	41.974
ENSRNOG00000017220	Tcirg1	T-cell immune regulator 1, ATPase H+ transporting V0 subunit A3 [Source:RGD Symbol;Acc:735136]	0.692	-0.530858	0.000848883	0.0351823	yes	down	21.06	26.74	22.08	15.51	14.33	21.17	22	16.18	23.2933	17.838
ENSRNOG00000019440	Kcnn4	potassium calcium-activated channel subfamily N member 4 [Source:RGD Symbol;Acc:621476]	0.399	-1.32598	0.000872124	0.0357367	yes	down	5.91	7.39	4.78	1.99	1.07	4.65	3.53	2.92	6.02667	2.832
ENSRNOG00000031824	Slc44a2	solute carrier family 44 member 2 [Source:RGD Symbol;Acc:1309680]	0.77	-0.37648	0.000895801	0.0360595	yes	down	46.26	63.43	50.62	41.1	38.97	46.48	54.49	45.1	53.4367	45.228
ENSRNOG00000001148	Rplp0	ribosomal protein lateral stalk subunit P0 [Source:RGD Symbol;Acc:621247]	0.65	-0.622258	0.000893327	0.0360595	yes	down	636.23	599.84	379.54	344.9	332.75	409.86	493.5	370.57	538.537	390.316
ENSRNOG00000015019	Spg21	SPG21, maspardin [Source:RGD Symbol;Acc:1359141]	0.747	-0.421175	0.00090309	0.0360595	yes	down	55.19	58.28	54.08	46.48	41.95	47.13	59.17	41.01	55.85	47.148
ENSRNOG00000022256	Cxcl10	C-X-C motif chemokine ligand 10 [Source:RGD Symbol;Acc:620209]	0.411	-1.28366	0.000889469	0.0360595	yes	down	7.58	29.73	19.13	7.66	5.2	12.21	10.61	5.76	18.8133	8.288
ENSRNOG00000001889	Comt	catechol-O-methyltransferase [Source:RGD Symbol;Acc:2379]	0.7	-0.515196	0.00092256	0.0365256	yes	down	73.09	83.68	66.39	53.03	44.9	60.83	76.07	54.27	74.3867	57.82
ENSRNOG00000000842	Ddah2	dimethylarginine dimethylaminohydrolase 2 [Source:RGD Symbol;Acc:1302955]	0.721	-0.472005	0.000920389	0.0365256	yes	down	72.91	64.96	52.72	45.6	54.04	51.6	50.45	51.5	63.53	50.638
ENSRNOG00000000457	Tap1	transporter 1, ATP binding cassette subfamily B member [Source:RGD Symbol;Acc:3817]	0.572	-0.805126	0.000970268	0.0376716	yes	down	7.5	10.4	7.76	3.57	3.77	5.66	8.51	3.81	8.55333	5.064
ENSRNOG00000029682	Clic1	chloride intracellular channel 1 [Source:RGD Symbol;Acc:1303043]	0.578	-0.790734	0.000976469	0.0378079	yes	down	49.31	66.15	42.31	31.89	21.27	38.77	49.13	26.8	52.59	33.572
ENSRNOG00000022839	Ifit3	interferon-induced protein with tetratricopeptide repeats 3 [Source:RGD Symbol;Acc:1359681]	0.526	-0.926625	0.00101149	0.038843	yes	down	3.46	8.27	6.34	4.14	2.83	4.38	2.93	2.9	6.02333	3.436
ENSRNOG00000042838	Junb	JunB proto-oncogene, AP-1 transcription factor subunit [Source:RGD Symbol;Acc:2944]	0.605	-0.725479	0.00101705	0.03895	yes	down	27.07	26.58	22.51	13.82	12.35	17.82	25.86	16.1	25.3867	17.19
ENSRNOG00000043098	Mt2A	metallothionein 2A [Source:RGD Symbol;Acc:1592345]	0.368	-1.44114	0.00102748	0.0392424	yes	down	1251.02	1283.17	710.51	304.73	217.67	735.03	503.04	439.66	1081.57	440.026
ENSRNOG00000017703	Unc93b1	unc-93 homolog B1, TLR signaling regulator [Source:RGD Symbol;Acc:1311984]	0.571	-0.807794	0.00103785	0.0393179	yes	down	25.46	37.21	27.02	16.88	11.28	23.19	27.43	15.11	29.8967	18.778
ENSRNOG00000061429	Rph3al	rabphilin 3A-like (without C2 domains) [Source:RGD Symbol;Acc:620342]	0.573	-0.804385	0.00103526	0.0393179	yes	down	5.61	5.62	5.74	3.05	2.38	3.86	5.19	3.62	5.65667	3.62
ENSRNOG00000009260	Cnr2	cannabinoid receptor 2 [Source:RGD Symbol;Acc:619713]	0.548	-0.868783	0.00105666	0.0397094	yes	down	2.68	2.87	2.72	2.35	1.37	2.08	2.3	1.29	2.75667	1.878
ENSRNOG00000024728	Arhgap22	Rho GTPase activating protein 22 [Source:RGD Symbol;Acc:1307237]	0.645	-0.631612	0.00110188	0.0410794	yes	down	11.45	11.09	8.03	6.56	6.01	7.37	8.09	8.48	10.19	7.302
ENSRNOG00000011138	Rpl29	ribosomal protein L29 [Source:RGD Symbol;Acc:62069]	0.832	-0.265915	0.00111688	0.0412241	yes	down	378.55	425.4	370.74	355.36	330.35	356.19	403.38	362.63	391.563	361.582
ENSRNOG00000010306	H2afz	H2A histone family, member Z [Source:RGD Symbol;Acc:621464]	0.76	-0.395816	0.00112182	0.0412241	yes	down	44.58	42.82	28.91	31.39	30.29	30.49	33.07	34.62	38.77	31.972
ENSRNOG00000060879	LOC100910996	uncharacterized LOC100910996 [Source:RGD Symbol;Acc:6495714]	0.653	-0.614132	0.0011087	0.0412241	yes	down	52.32	35.95	41.87	31.81	31.76	32	37.98	26.8	43.38	32.07
ENSRNOG00000016781	Ppib	peptidylprolyl isomerase B [Source:RGD Symbol;Acc:620312]	0.781	-0.356637	0.00111184	0.0412241	yes	down	134.78	129.62	111.81	100.18	100.64	101.84	120.68	106.86	125.403	106.04
ENSRNOG00000019246	Psme2	proteasome activator subunit 2 [Source:RGD Symbol;Acc:3430]	0.736	-0.442686	0.00112633	0.0412254	yes	down	41.86	40.31	42.19	29.67	30.52	35.47	40.72	34.04	41.4533	34.084
ENSRNOG00000033473	Rpl36	ribosomal protein L36 [Source:RGD Symbol;Acc:62085]	0.655	-0.6102	0.00114998	0.0415381	yes	down	457.26	328.11	295.71	236.5	225.79	288.26	266.53	275.48	360.36	258.512
ENSRNOG00000033256	LOC691141	hypothetical protein LOC691141 [Source:RGD Symbol;Acc:1587445]	0.444	-1.17146	0.0011526	0.0415381	yes	down	2.11	2.87	1.99	1	0.63	1.16	1.61	1.29	2.32333	1.138
ENSRNOG00000002610	Carhsp1	calcium regulated heat stable protein 1 [Source:RGD Symbol;Acc:708415]	0.817	-0.291548	0.00114715	0.0415381	yes	down	64.76	74.8	65.14	62.88	54.35	63.92	66.47	61.35	68.2333	61.794
ENSRNOG00000016484	Gstk1	glutathione S-transferase kappa 1 [Source:RGD Symbol;Acc:735188]	0.769	-0.378833	0.00115973	0.0416878	yes	down	46.49	50.37	40.83	40.61	34.87	40.24	43.6	36.71	45.8967	39.206
ENSRNOG00000021151	Ppp1r14b	protein phosphatase 1, regulatory (inhibitor) subunit 14B [Source:RGD Symbol;Acc:628702]	0.618	-0.695008	0.00116594	0.0418045	yes	down	56.62	41.85	35.39	29.31	25.29	30.46	34.69	35.33	44.62	31.016
ENSRNOG00000031443	Havcr2	hepatitis A virus cellular receptor 2 [Source:RGD Symbol;Acc:1305233]	0.625	-0.678466	0.00116935	0.0418181	yes	down	6.76	12.24	7.84	5.94	4.45	7.59	6.41	6.02	8.94667	6.082
ENSRNOG00000029813	AABR07035218.1	-	0.699	-0.515792	0.00117593	0.0418181	yes	down	56.87	58.64	51.61	43.74	41.23	47.01	38.2	42.93	55.7067	42.622
ENSRNOG00000003743	Dars	aspartyl-tRNA synthetase [Source:RGD Symbol;Acc:621167]	0.806	-0.311952	0.00117731	0.0418181	yes	down	330.35	352.08	307.95	285.11	258.08	299.03	322.22	239.32	330.127	280.752
ENSRNOG00000051300	AABR07039328.2	-	0.59	-0.761211	0.00119289	0.0420272	yes	down	29.7	20.91	22.01	13.92	14.66	17.27	14.36	19.76	24.2067	15.994
ENSRNOG00000051885	LOC100911991	elongation factor 1-alpha 1-like [Source:RGD Symbol;Acc:6489209]	0.755	-0.405417	0.00119309	0.0420272	yes	down	1007.2	974.11	965.49	859.18	728.57	805.32	1021.83	734.3	982.267	829.84
ENSRNOG00000012393	S100a13	S100 calcium binding protein A13 [Source:RGD Symbol;Acc:1304919]	0.738	-0.437376	0.00121565	0.0425023	yes	down	95.37	105.31	91.53	76.45	72.31	95.09	84.99	70.33	97.4033	79.834
ENSRNOG00000021161	Fermt3	fermitin family member 3 [Source:RGD Symbol;Acc:1310168]	0.509	-0.973204	0.00123153	0.0427475	yes	down	17.82	22.79	12.96	7.77	6.33	14.45	16.33	9.17	17.8567	10.81
ENSRNOG00000017063	Fcna	ficolin A [Source:RGD Symbol;Acc:621221]	0.439	-1.18838	0.00123178	0.0427475	yes	down	4.45	5.52	6.69	2.7	1.59	3.17	4.64	1.54	5.55333	2.728
ENSRNOG00000027024	Rgs16	regulator of G-protein signaling 16 [Source:RGD Symbol;Acc:1589741]	0.718	-0.47807	0.0012455	0.0431169	yes	down	9.18	12.1	9.6	8.15	6.42	9.12	8.59	8.43	10.2933	8.142
ENSRNOG00000049814	LOC100910882	RNA-binding protein 39-like [Source:RGD Symbol;Acc:6496028]	0.46	-1.12177	0.00124974	0.0431573	yes	down	9.48	8.86	5.22	1.96	5.07	4.63	2.97	5.37	7.85333	4
ENSRNOG00000033498	Cib1	calcium and integrin binding 1 [Source:RGD Symbol;Acc:620133]	0.624	-0.679801	0.00127282	0.0434815	yes	down	32.06	31.99	20.77	14.47	19.02	20.79	25.37	18.74	28.2733	19.678
ENSRNOG00000014179	Rps2	ribosomal protein S2 [Source:RGD Symbol;Acc:619887]	0.612	-0.708366	0.00129588	0.0439943	yes	down	511.89	383.01	278.08	224.3	219.86	282.62	338.71	280.5	390.993	269.198
ENSRNOG00000006508	Thnsl2	threonine synthase-like 2 [Source:RGD Symbol;Acc:1309144]	0.693	-0.528252	0.00130398	0.0440562	yes	down	8.81	10.16	6.52	6.45	6.12	6.18	7.4	6.49	8.49667	6.528
ENSRNOG00000013663	Tmem86a	transmembrane protein 86A [Source:RGD Symbol;Acc:1305749]	0.646	-0.629907	0.00130245	0.0440562	yes	down	16.02	24.06	20.47	12.81	11.18	15.66	20.43	11.99	20.1833	14.414
ENSRNOG00000020182	Mvp	major vault protein [Source:RGD Symbol;Acc:70932]	0.666	-0.586406	0.0013239	0.0445153	yes	down	23.89	25.59	19.66	15.28	12.72	17.92	23.58	16.01	23.0467	17.102
ENSRNOG00000000137	Ly86	lymphocyte antigen 86 [Source:RGD Symbol;Acc:1309936]	0.537	-0.896433	0.00132942	0.0445238	yes	down	16.68	26.77	24.04	13.28	7.99	18.73	16.83	9.63	22.4967	13.292
ENSRNOG00000053172	Ssr4	signal sequence receptor subunit 4 [Source:RGD Symbol;Acc:62034]	0.713	-0.488392	0.00133049	0.0445238	yes	down	82.59	79.6	58.15	53.64	54.16	55.77	68.7	59.45	73.4467	58.344
ENSRNOG00000022975	Nfam1	NFAT activating protein with ITAM motif 1 [Source:RGD Symbol;Acc:1308316]	0.662	-0.595189	0.00134983	0.0448506	yes	down	9.32	14.08	9.16	8.32	5.64	8.16	10.05	7.27	10.8533	7.888
ENSRNOG00000023576	RGD1305645	similar to RIKEN cDNA 1500015O10 [Source:RGD Symbol;Acc:1305645]	0.531	-0.91272	0.00136855	0.0452586	yes	down	19.52	20.47	10.37	8.27	10.47	8.19	15.17	7.68	16.7867	9.956
ENSRNOG00000021555	Mis18a	MIS18 kinetochore protein A [Source:RGD Symbol;Acc:1310778]	0.443	-1.17503	0.00139011	0.0457002	yes	down	5.77	7.52	2.59	3.9	1.98	2.29	2.18	2.44	5.29333	2.558
ENSRNOG00000016825	Cd3eap	CD3e molecule associated protein [Source:RGD Symbol;Acc:1591707]	0.652	-0.617241	0.00139165	0.0457002	yes	down	6.22	7.29	5.69	4.49	3.33	5.42	5.16	4.65	6.4	4.61
ENSRNOG00000007350	Rac2	Rac family small GTPase 2 [Source:RGD Symbol;Acc:1307568]	0.605	-0.72588	0.00140633	0.0460118	yes	down	19.6	27.9	18.95	13.22	9.16	18.09	18.63	14.5	22.15	14.72
ENSRNOG00000006283	LOC100362400	60S ribosomal protein L13-like [Source:RGD Symbol;Acc:2318188]	0.628	-0.670787	0.0014346	0.0465389	yes	down	387.37	331.3	222.64	206.82	166.01	213.81	264.87	250.11	313.77	220.324
ENSRNOG00000031315	LOC108348287	60S ribosomal protein L36a [Source:RGD Symbol;Acc:11421250]	0.71	-0.495059	0.00144112	0.046563	yes	down	376.43	326.77	431.47	274.42	282.31	312.73	310.23	324.17	378.223	300.772
ENSRNOG00000029627	LOC100359951	ribosomal protein S20-like [Source:RGD Symbol;Acc:2323094]	0.685	-0.546494	0.00144798	0.0466774	yes	down	361.32	322.99	228.79	213.2	221.35	254.12	223.86	248.08	304.367	232.122
ENSRNOG00000048812	Gpx1	glutathione peroxidase 1 [Source:RGD Symbol;Acc:2729]	0.668	-0.581968	0.00145445	0.0467786	yes	down	157.56	167.26	114.57	97.16	90.34	117.84	147.93	91.52	146.463	108.958
ENSRNOG00000020936	Nradd	neurotrophin receptor associated death domain [Source:RGD Symbol;Acc:708524]	0.51	-0.970533	0.0014594	0.0468307	yes	down	2.87	3.8	3.31	1.37	1.32	2.14	2.39	2.16	3.32667	1.876
ENSRNOG00000010986	Cmtm7	CKLF-like MARVEL transmembrane domain containing 7 [Source:RGD Symbol;Acc:1591926]	0.718	-0.478182	0.00148166	0.047087	yes	down	13.01	17.51	11.81	10.93	9.09	11.87	13.88	10.05	14.11	11.164
ENSRNOG00000018653	Pfdn1	prefoldin subunit 1 [Source:RGD Symbol;Acc:1305603]	0.802	-0.318302	0.00147705	0.047087	yes	down	132.16	131.6	132.04	112.18	108.81	113.75	127.29	123.35	131.933	117.076
ENSRNOG00000025936	Rpl6	ribosomal protein L6 [Source:RGD Symbol;Acc:619826]	0.717	-0.479245	0.0014793	0.047087	yes	down	394.44	323.94	328.82	256.73	243.32	276.32	341.56	266.82	349.067	276.95
ENSRNOG00000042886	Rps28	ribosomal protein S28 [Source:RGD Symbol;Acc:621046]	0.613	-0.707035	0.00149738	0.0472936	yes	down	307.66	229.73	167.5	145.7	153.57	199.05	165.12	144.21	234.963	161.53
ENSRNOG00000012062	Npc2	NPC intracellular cholesterol transporter 2 [Source:RGD Symbol;Acc:628756]	0.563	-0.830021	0.00150897	0.0475529	yes	down	594.55	959.16	540.56	353.27	237.67	538.12	621.65	373.54	698.09	424.85
ENSRNOG00000011893	Rps3a	ribosomal protein S3a [Source:RGD Symbol;Acc:62078]	0.707	-0.500382	0.00151846	0.0477448	yes	down	191.46	169.63	135.56	129.12	129.44	151.29	134.19	109.71	165.55	130.75
ENSRNOG00000001643	Psmg1	proteasome assembly chaperone 1 [Source:RGD Symbol;Acc:1305454]	0.747	-0.420834	0.00153289	0.0477711	yes	down	44.5	38.52	39.15	32.28	34.88	34.78	36.22	32.25	40.7233	34.082
ENSRNOG00000028015	Pf4	platelet factor 4 [Source:RGD Symbol;Acc:3305]	0.338	-1.56688	0.00153153	0.0477711	yes	down	65.97	42.6	39.82	12.7	4.74	29.81	29.23	17.95	49.4633	18.886
ENSRNOG00000016327	Mcee	methylmalonyl CoA epimerase [Source:RGD Symbol;Acc:1309966]	0.752	-0.411435	0.00155516	0.0482511	yes	down	36.97	40.46	28.88	26.4	28.75	28.59	31.55	29.03	35.4367	28.864
ENSRNOG00000019556	Cd9	CD9 molecule [Source:RGD Symbol;Acc:2318]	0.744	-0.427427	0.00156354	0.0483268	yes	down	287.24	376.07	264.57	235.72	210.89	284.19	303.39	234.52	309.293	253.742
ENSRNOG00000021206	Pla2g16	phospholipase A2, group XVI [Source:RGD Symbol;Acc:2829]	0.767	-0.383274	0.00156509	0.0483268	yes	down	113.25	116.72	87.35	91.48	83.89	88.29	95.09	91.73	105.773	90.096
ENSRNOG00000003457	Bicdl2	BICD family like cargo adaptor 2 [Source:RGD Symbol;Acc:1306729]	0.523	-0.93625	0.00156791	0.0483268	yes	down	0.84	0.66	0.63	0.36	0.51	0.33	0.51	0.36	0.71	0.414
ENSRNOG00000013564	Dok3	docking protein 3 [Source:RGD Symbol;Acc:1311840]	0.507	-0.978607	0.00160106	0.0491329	yes	down	4.48	4.35	4.29	1.72	1.49	3.16	3.39	2.62	4.37333	2.476
ENSRNOG00000001189	Sik1	salt-inducible kinase 1 [Source:RGD Symbol;Acc:69407]	0.629	-0.669094	0.0016315	0.0496335	yes	down	8.67	6.81	7.31	5.11	4.74	4.28	7.95	4.93	7.59667	5.402
ENSRNOG00000036834	Gpr84	G protein-coupled receptor 84 [Source:RGD Symbol;Acc:1585277]	0.593	-0.754993	0.00162797	0.0496335	yes	down	12.97	21.33	14.02	9.68	6.47	13.39	10.97	11.5	16.1067	10.402
